# Supplementary material for: A palate of fluorescent corannulene derivatives: synthesis, spectroscopic properties, and bio-imaging application
Source: Royal Society of Chemistry journal article supplement (doi:10.1039/d1cc02307a), 2021-01-01
Supplement: d1cc02307a1.pdf [file d1cc02307a1.pdf]

**Supporting Information for:**

**A palate of fluorescent corannulene derivatives: synthesis,  
spectroscopic properties, and bio-imaging application**

Yali Wang, Haiyan Jiang, Xueling Liu, Jun Xu, Yan Gao and Nathaniel S. Finney\*

School of Pharmaceutical Sciences and Technology, Health Sciences Platform,

Tianjin University. 92 Weijin Road, Nankai District, Tianjin, 300072, China.

Email: [nfinney@tju.edu.cn](mailto:nfinney@tju.edu.cn)

**Content**

|                                                |           |
|------------------------------------------------|-----------|
| <b>1. General Experimental Details.....</b>    | <b>2</b>  |
| <b>2. Synthesis and Characterization .....</b> | <b>4</b>  |
| <b>3. Optical Data and Spectra .....</b>       | <b>9</b>  |
| <b>4. Cell Viability Assay .....</b>           | <b>15</b> |
| <b>5. Confocal Fluorescence Imaging .....</b>  | <b>16</b> |
| <b>6. X-Ray Crystal Data .....</b>             | <b>19</b> |
| <b>7. NMR and HRMS Spectra.....</b>            | <b>21</b> |

## 1. General Experimental Details

### 1.1 Materials and instruments

Unless otherwise indicated, all reagents used for reactions were purchased without further purification and dry solvent was obtained by filtration of reagent-grade solvent through an Innovative Technologies solvent drying system. Cell lines (HEK 293T healthy cell line, RAW 264.7 macrophage cell line and HeLa cancerous cells) were purchased from Type Culture Collection of the Chinese Academy of Sciences, Shanghai, China. Hoechst 33342 and Thiazolyl Blue Tetrazolium Bromide (MTT) were purchased from Solarbio life sciences. All reactions were monitored by thin layer chromatography (TLC) using UV indicator and Chromatographic purifications were performed on silica gel 60 (particle size 0.040 - 0.063 mm), both of which were purchased from the Qingdao Haiyang Chemical Co., Ltd.

$^1\text{H}$  NMR and  $^{13}\text{C}$  NMR spectra were recorded with Bruker Ascend III 400 and Avance III 600 instruments at 298.6 K.  $^1\text{H}$  NMR chemical shifts were recorded in parts per million (ppm) relative to  $\text{CDCl}_3$  ( $\delta = 7.26$  ppm) and  $\text{MSO}-d_6$  ( $\delta = 2.50$  ppm). Multiplicities are given as s (singlet), d (doublet), t (triplet), q (quartet), dd (doublet of doublets), m (multiplet).  $^{13}\text{C}$  NMR chemical shifts were recorded in parts per million (ppm) relative to  $\text{CDCl}_3$  ( $\delta = 77.00$  ppm),  $\text{DMSO}-d_6$  ( $\delta = 49.7$  ppm). HRMS data were obtained with Q Exactive HF LC-MS ESI mode. The UV absorption spectra were measured with Hitachi U-3900 spectrophotometer. Fluorescence measurements were carried out on Edinburgh FLS 980 spectrophotometer, using a 450 W xenon lamp. Absolute quantum yields were measured by using an integrating sphere detector from Edinburgh Instruments. Confocal fluorescence imaging was obtained under Leica TCS SP5 confocal laser scanning microscope. The average particle size at room temperature was obtained by dynamic light scattering (DLS) on Zetasizer Nanoseries (Nano ZS90). Transmission electron microscopy (TEM) pictures were obtained on a FEI Tecnai F30 transmission electron microscope at 200 kV acceleration voltage.

### 1.2 General procedures for the spectra measurement

All spectroscopic measurements were carried out at room temperature with HPLC grade solvents. The concentration of measured samples was 10  $\mu\text{M}$  obtained by diluting the stock solution (10 mM). The UV-vis absorbance and fluorescence emission measurements were performed using a 10.0 mm path length quartz fluorescence cuvette. The slit width of excitation and emission was set as 2 nm.

### 1.3 X-ray crystallography

Crystals of **NI-Cor** and **BODIPY-Cor** were formed by slow evaporation of a mixture of minimal dichloromethane and an appropriate amount of hexane at room temperature. Single crystals suitable for X-ray diffraction were selected and mounted in inert oil and their X-ray diffraction intensity data was collected at 100 K on a Rigaku XtaLAB FRX diffractometer equipped with a Hypix6000HE detector, using  $\text{Cu K}\alpha$

radiation ( $\lambda = 1.54184 \text{ \AA}$ ) under the program CrysAlisPro. The data set was collected with redundancy factors of 10 and to a resolution of  $0.79 \text{ \AA}$ . The hydrogen atoms were set in calculated positions and refined as riding atoms with a common fixed isotropic thermal parameter.

#### **1.4 Computational method.**

All calculations were performed with Gaussian 09 packages<sup>1</sup> unless otherwise noted. The DFT method was employed using the B3LYP hybrid functional. Structures were optimized with the 6-31G(d) basis set.<sup>2-5</sup> The SMD implicit solvation model<sup>6</sup> was used to take account of the solvation effect of methanol.

#### **1.5 Cell culture and viability assay**

Cells were incubated in Dulbeccos modified Eagles medium (DMEM) supplement with 10% (v/v) Fetal Bovine Serum (FBS, Gibco), 100 U/mL penicillin, and 100  $\mu\text{g/mL}$  streptomycin at  $37 \text{ }^\circ\text{C}$  with 5 %  $\text{CO}_2$  in appropriate humidity. Before MTT test (MTT, a commercially available cell viability dye), three cell lines ( $10^4$  cells/well for 24/48 h,  $0.5 \times 10^4$  cells/well for 72 h) were dispersed in 96-well cell culture plates, and filled to 200  $\mu\text{L}$  per well. 24 h after incubation, the medium was removed and the cells were supplemented with medium containing each corannulene derivative of different concentrations (5, 10, 20, 30, 50, 100  $\mu\text{M}$ ) containing 1% DMSO and cultured for 24, 48 and 72 h. Cells incubated with no compounds were used as blank control. Cells incubated with no compounds but 1% DMSO were used as positive control. After removal of the medium, 100  $\mu\text{L}$  MTT solutions (0.5 mg/mL) were added to each well away from light. After 4 h, the MTT solutions were removed, and 200  $\mu\text{L}$  of DMSO was added to each well to fully dissolve the formed formazan crystals by a shaker. Finally, a microplate reader was used to measure the absorbance at 570 nm.

#### **1.6 Confocal fluorescence imaging**

The three cell lines were incubated for 24 h before probes loading on an uncoated 20 mm diameter glass-bottomed dish (NEST). Before loading the probes (**X-Cor** conjugates), cells were rinsed with phosphate buffered saline (PBS) for three times and then incubated with probes (5  $\mu\text{M}$ ) and Hoechst 33342 (1  $\mu\text{M}$ ) for 30 minutes at  $37 \text{ }^\circ\text{C}$ . Then, washed twice by PBS to remove the excess dyes before confocal fluorescence imaging. To evaluate the organelle-targetable ability, cells were first incubated with probes (1  $\mu\text{M}$ ) for 10 min at  $37 \text{ }^\circ\text{C}$  in a 5%  $\text{CO}_2$ / 95% air incubator. Then 1 mL of aqueous solution of MitoTracker dye (Green or Red, final concentration, 100 nM) or 1 mL of aqueous solution of LysoTracker dye (Green or Red, final concentration, 100 nM) was added into the culture medium. The cells were incubated for another 30 minutes. After washing with PBS buffer, the co-stained cells were subjected to the confocal fluorescence imaging measurements with Leica TCS SP8 confocal laser scanning microscope.

## 2. Synthesis and Characterization

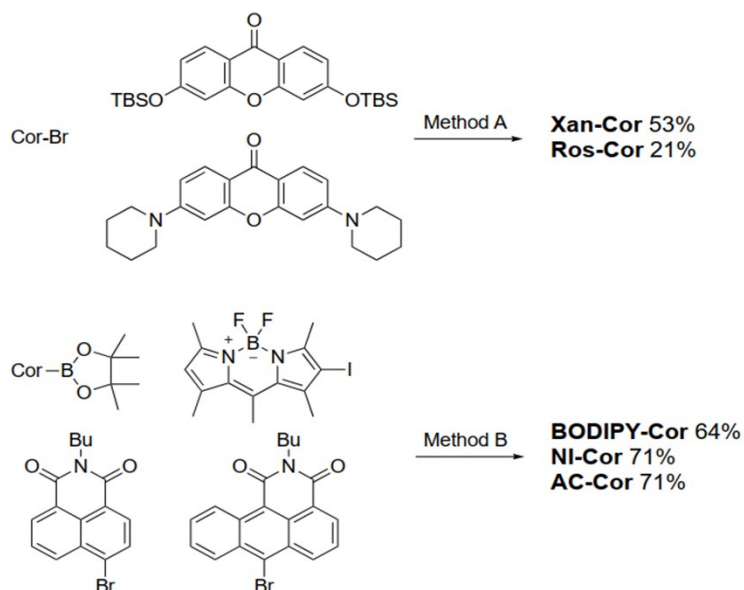

### Scheme S1 Synthesis of Xan-Cor, Ros-Cor, BODIPY-Cor, NI-Cor, and AC-Cor.

Method A: 1. Cor-Br, *t*-BuLi, THF; ketone, THF. 2. aq. HCl.

Method B: Cor-Bpin, fluorophore-Br/I, cat. Pd(PPh<sub>3</sub>)<sub>4</sub>, K<sub>2</sub>CO<sub>3</sub>, THF/H<sub>2</sub>O.

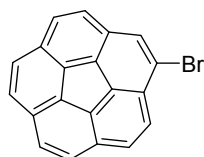

**Br-Cor (1):** Corannulene (500 mg, 2 mmol) and *N*-bromosuccinimide (390 mg, 2.2 mmol) were placed into a 25 mL flask, then, dry DCM (10 mL) was added into the mixture and stirred at room temperature (RT) for 20 h. After that, 10 mL of saturated NH<sub>4</sub>Cl was added to quench the reaction, washed with water (3 x 10 mL), dried over anhydrous Na<sub>2</sub>SO<sub>4</sub> and concentrated under reduced pressure. The residue was further purified by column chromatography (hexane) to afford pure product as a white solid (52%). The spectroscopic data was in agree with the data reported in the literature.<sup>7</sup>

<sup>1</sup>H NMR (600 MHz, CDCl<sub>3</sub>) δ 8.01 (s, 1H), 7.91 (d, *J* = 9.9 Hz, 1H), 7.88–7.72 (m, 6H), 7.72–7.65 (m, 1H).

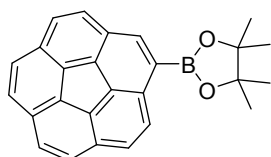

**Bpin-Cor (2):** **1** (329 mg, 1 mmol), bis(pinacolato)diboron (340 mg, 1.5 mmol), [PdCl<sub>2</sub>(dppf)] (7.31 mg, 0.01 mmol), and AcOK (300 mg, 3 mmol) were mixed into a sealed tube and stirred at 120 °C for 12 hours, After cooled to room temperature, the mixture was concentrated under reduced pressure, and dissolved into EtOAc (20 mL), washed with water (3 x 10 mL), dried over anhydrous Na<sub>2</sub>SO<sub>4</sub> and concentrated under reduced pressure. The residue was further purified by column chromatography (hexane to hexane:EA 10:1) to afford pure product as a yellow solid (63%). The spectroscopic data was in agree with the data reported in the literature.<sup>8</sup>

$^1\text{H}$  NMR (400 MHz,  $\text{CDCl}_3$ )  $\delta$  8.49 (s, 1H), 8.45 (d,  $J = 8.9$  Hz, 1H), 7.85–7.77 (m, 7H), 1.45 (s, 12H).

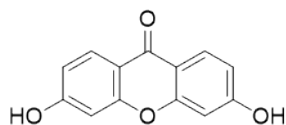

**3,6-dihydroxy-9H-xanthen-9-one (3):** A sealed 20-mL glass tube containing a suspension of the bis(2,4-dihydroxyphenyl)methanone (492 mg, 2 mmol) and NaOAc (16.4 mg, 0.2 mmol) in water (8 mL) was introduced in the cavity of the CEM microwave reactor and irradiated at 150 °C for 2 hours under magnetic stirring. After cooling to room temperature by air flow, the tube was removed from the rotor, and the reaction precipitate was filtered and washed with water, then dried to give a pale yellow solid product (98%). The spectroscopic data was in agree with the data reported in the literature.<sup>9</sup>

$^1\text{H}$  NMR (400 MHz,  $\text{DMSO}-d_6$ ):  $\delta$  10.83 (s, 2H), 8.01-7.99 (d,  $J = 8.6$  Hz 2H,), 6.90-6.87 (dd,  $J = 8.7, 2.2$  Hz, 2H,), 6.84-6.84 (d,  $J = 2.2$  Hz, 2H,).

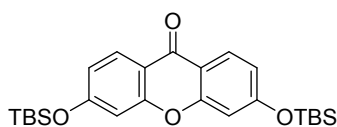

**3,6-bis((tert-butyldimethylsilyl)oxyl)-9H-xanthen-9-one (4):** A mixture of **3** (456 mg, 2 mmol) and imidazole (1.36 g, 20 mmol) was dissolved in dry DMF (40 mL), and solid TBDMSCl (1.81 g, 12 mmol) was added. The reaction was stirred for 1 hour at room temperature (full dissolution followed by precipitation of product takes place), and water (100 mL) was then added and stirred for 15 minutes. The precipitated product was filtered and washed with water (3 x 30 mL), dried on air and in vacuum to give white powder compound, which were further purified by column chromatography ( $\text{DCM}:\text{CH}_3\text{OH}$ , 100:1) to afford pure product as a white solid (99%). The spectroscopic data was in agree with the data reported in the literature.<sup>10</sup>

$^1\text{H}$  NMR (400 MHz,  $\text{DMSO}-d_6$ ):  $\delta$  8.19 (d,  $J = 9.0$  Hz, 2H,), 6.86 (m, 2H,), 6.84 (m, 2H,), 1.01 (s, 18 H), 0.29 (s, 12 H).

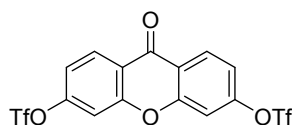

**9-oxo-9H-xanthene-3,6-diyl bis(trifluoromethanesulfonate) (5):** **3** (1.14 g, 5 mmol) was dissolved in 25 mL dry DCM and pyridine (4.1 mL, 50 mmol) was added slowly at 0 °C. The mixture was stirred at 0 °C for 10 min then trifluoromethanesulfonic anhydride (2.5 mL, 15 mmol) was added dropwise over 2 minutes. The reaction mixture was warmed to room temperature slowly and stirred for 12 hours, then quenched with water and the organic layer was washed with water (1 x 10 mL), 1N HCl (3 x 10 mL), brine (1 x 10 mL) and dried over  $\text{Na}_2\text{SO}_4$ . The solvents were removed under reduced pressure and the residue was purified by column chromatography ( $\text{DCM}:\text{Hexane}$ , 1:1) to afford the pure product as an white crystal (94%). The spectroscopic data was in agree with the data reported in the literature.<sup>11</sup>

$^1\text{H}$  NMR (400 MHz,  $\text{CDCl}_3$ ):  $\delta$  8.46-8.44 (d,  $J = 8.9$  Hz, 2H), 7.50-7.49 (d,  $J = 2.3$  Hz 2H), 7.37-7.34 (dd,  $J = 8.9, 2.3$  Hz, 2H).

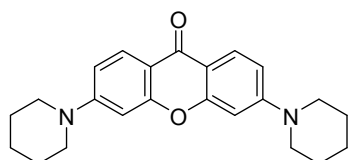

**3,6-di(piperidin-1-yl)-9H-xanthen-9-one: (6)** **5** (246 mg, 0.5 mmol) was dissolved in DMSO (5 mL) and piperidine (426 mg, 0.5 mL, 5 mmol) was added. The reaction

mixture was heated to 90 °C and stirred for 12 hours.

After cooling to room temperature, the reaction was quenched with water. The precipitate was filtered off, washed with saturated Na<sub>2</sub>CO<sub>3</sub> (aq.) and water to give the crude product, which was purified by column chromatography (DCM:CH<sub>3</sub>OH, 200:1) to afford the pure product as yellow solid (91%). The spectroscopic data was in agreement with the data reported in the literature.<sup>11</sup>

<sup>1</sup>H NMR (400 MHz, DMSO-*d*<sub>6</sub>): δ 7.88-7.85 (d, 2H, *J* = 9.0 Hz), 6.99-6.96 (dd, *J* = 9.1, 2.3 Hz, 2H), 6.74-6.73 (d, *J* = 2.4 Hz, 2H), 3.42-3.40 (m, 8H), 1.59 (br, 8H).

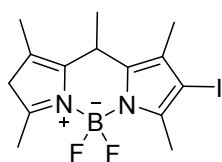

**4,4-Difluoro-1,3,5,7,8-pentamethyl-2-iodo-6-ethyl-4-bora-3a,4a-diaza-s-indacene: (7)** 4,4-Difluoro-1,3,5,7,8-pentamethyl-4-bora-3a,4a-diaza-s-indacene (67.9 mg, 0.259 mmol) was dissolved in MeOH (15 ml), then added a MeOH solution (1.5 ml) of iodine monochloride (13 μl, 0.259 mmol). Stirred at room temperature

for 40 min. Added DCM (10 mL), the organic layer was washed with water (1 x 10 mL), brine (1 x 10 mL) and dried over Na<sub>2</sub>SO<sub>4</sub>. The solvents were removed under reduced pressure and the residue was purified by column chromatography (DCM: hexane, 1:4) to afford the pure product as a yellow solid (63%). The spectroscopic data was in agreement with the data reported in the literature.<sup>12</sup>

<sup>1</sup>H NMR (400 MHz, CDCl<sub>3</sub>); δ: 6.06 (s, 1H), 2.54 (s, 3H), 2.53 (s, 3H), 2.46 (s, 3H), 2.39 (s, 3H), 2.36 (s, 3H).

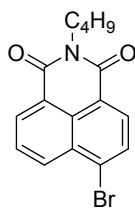

**4-Bromo-N-n-butyl-1,8-naphthalimide: (8)** A suspension of 4-bromo-1,8-naphthalic anhydride (1 g, 3.5 mmol) and n-butylamine (511 mg, 7 mmol) in 30 mL of ethanol was refluxed with stirring for 3 h. After the reaction was complete, the reaction mixture was cooled to room temperature and the solid phase was filtered off, washed with ethanol and dried to give pure 4-bromo-N-n-butyl-1,8-naphthalimide as a light yellow solid (93%).

The spectroscopic data was in agreement with the data reported in the literature.<sup>13</sup>

<sup>1</sup>H NMR (400 MHz, CDCl<sub>3</sub>) δ 8.58 (d, *J* = 7.3 Hz, 1H), 8.48 (d, *J* = 7.6 Hz, 1H), 8.34 (d, *J* = 7.9 Hz, 1H), 7.97 (d, *J* = 7.9 Hz, 1H), 7.86–7.71 (t, *J* = 7.9 Hz, 1H), 4.20–4.03 (m, 2H), 1.70 (m, 2H), 1.43 (m, 2H), 0.97 (t, *J* = 7.4 Hz, 3H).

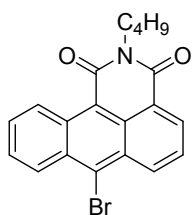

**10-bromo-N-(n-butyl-anthracenecarboximide: (9)** A suspension of 10-bromo-1,2-dicarboxyanthracene anhydride<sup>[8]</sup> (1 g, 3 mmol) and n-butylamine (300 mg, 4 mmol) in 30 mL of ethanol was stirred at 75 °C for 12 h. After the reaction was complete, the reaction mixture was cooled to room temperature, solvent was removed under reduced pressure and the crude product was purified by column

chromatography on silica gel (PE: DCM 3: 1) to afford compound as an orange solid (64%). The spectroscopic data was in agreement with the data reported in the literature.<sup>14</sup>

<sup>1</sup>H NMR (600 MHz, CDCl<sub>3</sub>) δ 9.98 (d, *J* = 9.1 Hz, 1H), 8.79 (d, *J* = 8.7 Hz, 1H), 8.71 (d, *J* = 7.0 Hz, 1H), 8.59 (d, *J* = 8.8 Hz, 1H), 7.82–7.60 (m, 3H), 4.29–4.11 (t, *J* = 6.0 Hz, 2H), 1.81–1.71 (m, 2H), 1.50 (m, 2H), 1.02 (t, *J* = 5.4 Hz, 3H).

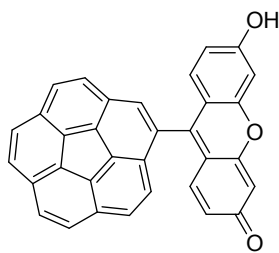

**Xan-Cor: (10) 1** (100 mg, 0.3 mmol) was dissolved in dry THF (5 mL) in an overdried 25 mL flask and cooled to  $-78^{\circ}\text{C}$ . The mixture was degassed three times by evacuating the flask and backfilling with Ar. Then, 1.3 M *t*-BuLi (0.28 mL, 0.36 mmol) was added to the mixture over a period of 2 minutes. The mixture was stirred at  $-78^{\circ}\text{C}$  for 30 minutes, and a solution of **4** (140 mg, 0.3 mmol) in anhydrous THF (2 mL) was slowly

added. Stirring was continued at room temperature for 2 hours. Then 2 N HCl aq. (1 mL) was added to it and stirred for 20 minutes, washed with water (3 x 10 mL), dried over anhydrous  $\text{Na}_2\text{SO}_4$  and concentrated under reduced pressure. The residue was further purified by column chromatography (DCM: $\text{CH}_3\text{OH}$ , 100:1) to afford pure product as an orange solid (53%).

$^1\text{H}$  NMR (400 MHz,  $\text{DMSO}-d_6$ )  $\delta$  8.19 (s, 1H), 8.13 (s, 2H), 8.09–7.98 (m, 4H), 7.93 (d,  $J = 8.9$  Hz, 1H), 7.52 (s, 1H), 7.37 (s, 2H), 7.20 (s, 2H), 6.89 (d,  $J = 9.5$  Hz, 2H).

$^{13}\text{C}$  NMR (151 MHz,  $\text{DMSO}-d_6$ )  $\delta$  157.92, 135.63, 135.32, 134.75, 134.58, 134.16, 132.47, 131.55, 131.15, 130.97, 130.40, 129.55, 129.29, 128.98, 128.58, 128.39, 128.19, 128.16, 127.83, 127.69, 127.60, 125.62, 116.90, 102.80.

HRMS (ESI)  $m/z$  calc'd for  $\text{C}_{33}\text{H}_{16}\text{O}_3$  [ $\text{M}+\text{H}^+$ ]: 461.1099; found 461.11762.

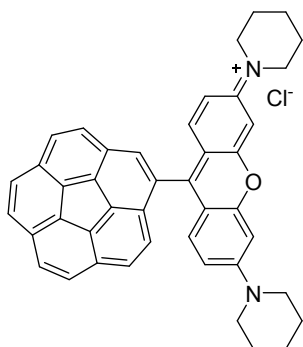

**Ros-Cor: (11) 1** (100 mg, 0.3 mmol) was dissolved in dry THF (5 mL) in an overdried 25 mL flask and cooled to  $-78^{\circ}\text{C}$ . The mixture was degassed three times by evacuating the flask and backfilling with Ar. Then, 1.3 M *t*-BuLi (0.28 mL, 0.36 mmol) was added to the mixture over a period of 2 minutes.

The mixture was stirred at  $-78^{\circ}\text{C}$  for 30 minutes, and a solution of **6** (110 mg, 0.3 mmol) in anhydrous THF (2 mL) was slowly added. Stirring was continued at room temperature for 2 hours. Then 2 N HCl aq. (1 mL) was added

to it and stirred for 20 minutes, washed with water (3 x 10 mL), dried over anhydrous  $\text{Na}_2\text{SO}_4$  and concentrated under reduced pressure. The residue was further purified by column chromatography (DCM :  $\text{CH}_3\text{OH}$ , 50:1) to afford pure product as a purple solid (21%).

$^1\text{H}$  NMR (400 MHz,  $\text{DMSO}-d_6$ )  $\delta$  8.16 (s, 1H), 8.12 (d,  $J = 8.7$  Hz, 2H), 8.11–7.96 (m, 5H), 7.93 (d,  $J = 8.9$  Hz, 1H), 7.52 (d,  $J = 8.9$  Hz, 1H), 7.23–7.14 (m, 5H), 3.74 (t,  $J = 5.3$  Hz, 8H), 1.77 – 1.55 (m, 12H).

$^{13}\text{C}$  NMR (101 MHz,  $\text{DMSO}$ )  $\delta$  158.36, 156.49, 153.90, 136.11, 135.77, 135.25, 135.11, 134.71, 132.37, 132.02, 131.67, 131.47, 130.85, 129.99, 129.85, 129.53, 129.12, 128.92, 128.72, 128.38, 128.11, 126.12, 115.50, 114.92, 97.32, 48.92, 26.22, 24.21.

HRMS (ESI)  $m/z$  calc'd for  $\text{C}_{43}\text{H}_{35}\text{N}_2\text{O}^+$  [ $\text{M}^+$ ]: 595.2749; found: 595.27512.

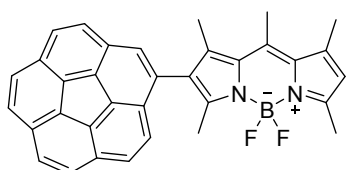

**BODIPY-Cor: (12) 2** (100 mg, 0.26 mmol), **7** (80 mg, 0.2 mmol), and potassium carbonate (70 mg, 0.5 mmol) were added to a 25 mL flask, then, 5 mL THF and 0.5 mL water were added. The mixture was degassed three times by evacuating the flask and backfilling with Ar. Then,

$\text{Pd}(\text{PPh}_3)_4$  (15 mg, 0.013 mmol) was added to the mixture. The mixture was stirring

and refluxing for 12 h. After it cooled to room temperature, the reaction mixture was extracted with saturated sodium bicarbonate and DCM. Organic phase was collected and washed with water (3 x 10 mL), dried over anhydrous Na<sub>2</sub>SO<sub>4</sub> and concentrated under reduced pressure. The residue was further purified by column chromatography (DCM:PE, 1:1) to afford pure product as an orange solid (64%).

<sup>1</sup>H NMR (600 MHz, CDCl<sub>3</sub>) δ 7.88–7.80 (m, 6H), 7.77 (d, *J* = 8.8 Hz, 1H), 7.61 (s, 1H), 7.52 (d, *J* = 8.6 Hz, 1H), 6.14 (s, 1H), 2.71 (s, 3H), 2.59 (s, 3H), 2.48 (s, 3H), 2.46 (s, 3H), 2.36 (s, 3H).

<sup>13</sup>C NMR (151 MHz, CDCl<sub>3</sub>) δ 154.51, 152.74, 153.91, 141.78, 141.53, 138.30, 136.12, 135.92, 135.88, 135.70, 135.32, 132.83, 132.72, 131.99, 131.38, 130.98, 130.87, 130.86, 130.70, 130.56, 128.34, 127.34, 127.26, 127.20, 127.10, 127.00, 126.92, 126.52, 121.70, 17.45, 16.86, 15.90, 14.52, 13.48.

HRMS (ESI) *m/z* calc'd for C<sub>34</sub>H<sub>27</sub>BF<sub>2</sub>N<sub>2</sub> [M+Na<sup>+</sup>]: 533.1977; found: 533.19710.

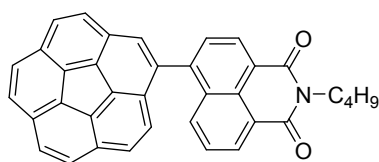

**NI-Cor: (13) 2** (100 mg, 0.26 mmol), **8** (70 mg, 0.2 mmol), and potassium carbonate (70 mg, 0.5 mmol) were added to a 25 mL flask, then, 5 mL THF and 0.5 mL water was added. The mixture was degassed three times by evacuating the flask and backfilling

with Ar. Then, Pd (PPh<sub>3</sub>)<sub>4</sub> (15 mg, 0.013 mmol) was added to the mixture. The mixture was stirring and refluxing for 12 h. After it cooled to room temperature, the reaction mixture was extracted with saturated sodium bicarbonate and DCM. Organic phase was collected and washed with water (3 x 10 mL), dried over anhydrous Na<sub>2</sub>SO<sub>4</sub> and concentrated under reduced pressure. The residue was further purified by column chromatography (DCM) to afford pure product as a white solid (71%).

<sup>1</sup>H NMR (600 MHz, DMSO-*d*<sub>6</sub>) δ 8.63 (d, *J* = 7.4 Hz, 1H), 8.59 (d, *J* = 6.9 Hz, 1H), 8.39 (s, 1H), 8.14 (s, 1H), 8.10–8.01 (m, 5H), 7.97 (d, *J* = 8.7 Hz, 1H), 7.93 (d, *J* = 6.0 Hz, 1H), 7.86 (d, *J* = 8.8 Hz, 1H), 7.82 (t, *J* = 7.7 Hz, 1H), 7.24 (d, *J* = 8.8 Hz, 1H), 4.13 (t, *J* = 7.5 Hz, 2H), 1.72–1.66 (m, 2H), 1.41 (m, 2H), 0.97 (t, *J* = 7.4 Hz, 3H).

<sup>13</sup>C NMR (151 MHz, DMSO-*d*<sub>6</sub>) δ 163.46, 163.26, 143.33, 135.42, 134.95, 134.89, 134.81, 134.67, 132.62, 131.09, 130.98, 130.90, 130.74, 130.70, 130.35, 130.31, 130.10, 129.52, 128.80, 128.19, 128.02, 127.86, 127.84, 127.76, 127.66, 127.59, 127.40, 40.09, 29.68, 19.80, 13.71.

HRMS (ESI) *m/z* calc'd for C<sub>36</sub>H<sub>23</sub>NO<sub>2</sub> [M+H<sup>+</sup>]: 502.1807; found: 502.17930.

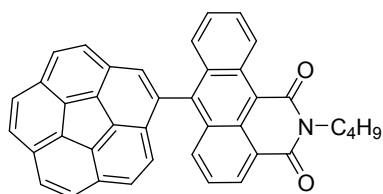

**AC-Cor: (14) 2** (100 mg, 0.26 mmol), **9** (77 mg, 0.2 mmol), and potassium carbonate (70 mg, 0.5 mmol) were added to a 25 mL flask, then, 5 mL THF and 0.5 mL water was added. The mixture was degassed three times by evacuating the flask and backfilling with Ar.

Then, Pd (PPh<sub>3</sub>)<sub>4</sub> (15 mg, 0.013 mmol) was added to the mixture. The mixture was stirring and refluxing for 12 h. After it cooled to room temperature, the reaction mixture was extracted with saturated sodium bicarbonate and DCM. Organic phase was collected and washed with water (3 x 10 mL), dried over anhydrous Na<sub>2</sub>SO<sub>4</sub> and concentrated under reduced pressure. The residue was further purified by column chromatography (DCM) to afford pure product as an orange solid (71%).



$^1\text{H}$  NMR (600 MHz,  $\text{CDCl}_3$ )  $\delta$  10.22 (d,  $J = 9.2$  Hz, 1H), 8.77 (d,  $J = 6.8$  Hz, 1H), 7.96–7.85 (m, 6H), 7.85–7.79 (m, 3H), 7.77–7.63 (m, 1H), 7.60 (d,  $J = 8.8$  Hz, 1H), 7.46 (d,  $J = 8.2$  Hz, 1H), 7.36 (s, 1H), 6.92 (d,  $J = 8.8$  Hz, 1H), 4.45–4.22 (m, 2H), 1.85 (s, 2H), 1.57 (s, 2H), 1.05 (t,  $J = 7.4$  Hz, 3H).

$^{13}\text{C}$  NMR (151 MHz,  $\text{CDCl}_3$ )  $\delta$  163.85, 165.30, 144.46, 136.47, 136.02, 135.90, 135.80, 135.60, 135.21, 134.36, 133.48, 133.35, 132.52, 131.27, 131.35, 130.96, 130.93, 130.80, 130.02, 129.17, 128.16, 128.65, 127.86, 127.74, 127.64, 127.56, 127.33, 127.15, 127.02, 126.92, 126.44, 125.74, 125.37, 122.67, 115.92, 76.78, 40.60, 30.36, 20.56, 13.92.

HRMS (ESI)  $m/z$  calc'd for  $\text{C}_{40}\text{H}_{25}\text{NO}_2$   $[\text{M}+\text{H}^+]$ : 552.1964; found: 552.19533.

### 3. Optical Data and Spectra

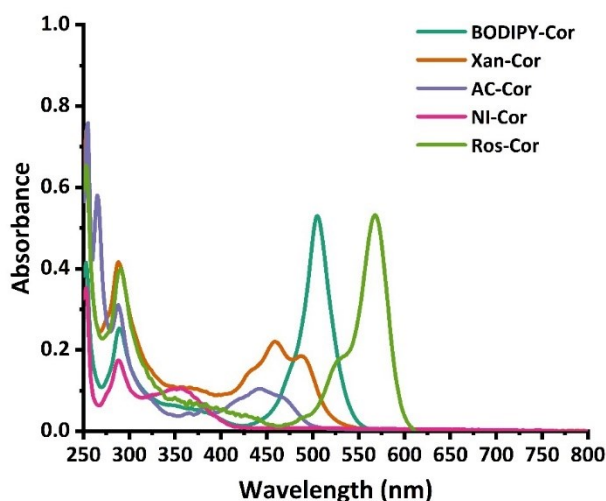

**Fig. S1** Absorption spectra of the X-Cor conjugates ( $\sim 10$   $\mu\text{M}$ ) in MeOH.

**Table S1** Comparison of the optical properties of **X-Cor** conjugates and **Ph-fluorophores**<sup>a-d</sup>

|                                | $\lambda_{\max}$ (exc1) | $\epsilon_{\max}$ | $\lambda_{\max}$ (em) | $\phi$ | Stokes shift |
|--------------------------------|-------------------------|-------------------|-----------------------|--------|--------------|
| <b>Cor</b>                     | 288                     | 4.9               | 436                   | 0.01   | 148          |
| <b>Xan-Ph</b> <sup>15</sup>    | 488                     | 1.9               | 518                   | 0.3    | 30           |
| <b>Xan-Cor</b>                 | 490                     | 1.84              | 540                   | 0.31   | 50           |
| <b>Ros-Ph</b> <sup>16</sup>    | 564                     | 8.67              | 588                   | 0.3    | 24           |
| <b>Ros-Cor</b>                 | 569                     | 5.82              | 598                   | 0.25   | 29           |
| <b>BODIPY-Ph</b> <sup>17</sup> | 503                     | 8.5               | 529                   | 0.71   | 26           |
| <b>BODIPY-Cor</b>              | 506                     | 5.86              | 542                   | 0.73   | 36           |
| <b>NI-Ph</b>                   | n.a                     | n.a               | n.a                   | n.a    | n.a          |
| <b>NI-Cor</b>                  | 355                     | 1.05              | 502                   | 0.63   | 147          |
| <b>AC-Ph</b>                   | n.a                     | n.a               | n.a                   | n.a    | n.a          |
| <b>AC-Cor</b>                  | 444                     | 1.04              | 542                   | 0.94   | 98           |

<sup>a</sup> All measurements made at  $\sim 10^{-5}$  M in CH<sub>3</sub>OH. <sup>b</sup>  $\lambda$  values in nm. <sup>c</sup>  $\lambda_{\max}$ (exc) for direct excitation of the fluorophore. <sup>d</sup>  $(\text{M}^{-1} \text{cm}^{-1}) \times 10^4$ . <sup>e</sup> n.a. = not available.

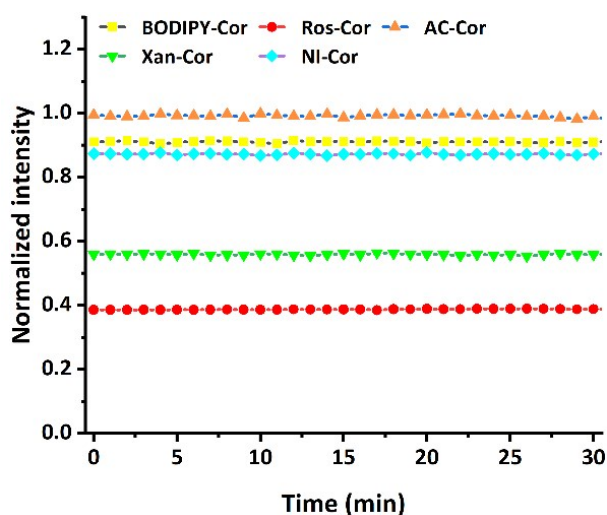**Fig. S2** Photostability examination of **X-Cor** conjugates ( $\sim 10 \mu\text{M}$ ) in MeOH monitored at maximum emission wavelength under continuous irradiation by a 450 W xenon lamp.

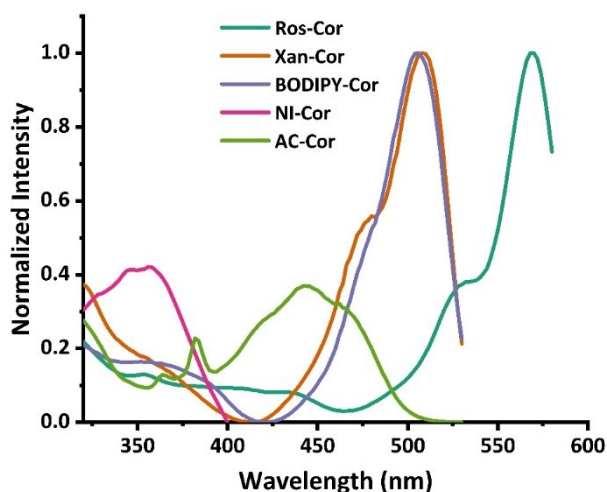

**Fig. S3** Normalized excitation spectra (X-axis set so that it only shows the part of the spectrum for direct excitation of the fluorophore) of the **X-Cor** conjugates ( $\sim 10 \mu\text{M}$ ) in MeOH.

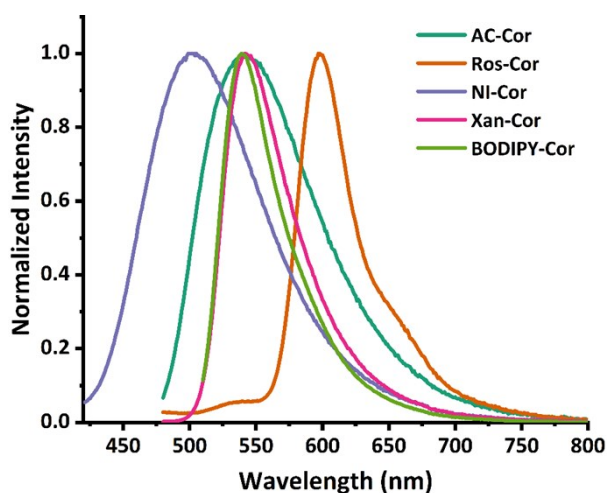

**Fig. S4** Normalized emission spectra for direct fluorophore excitation of the **X-Cor** conjugates ( $\sim 10 \mu\text{M}$ ) in MeOH.

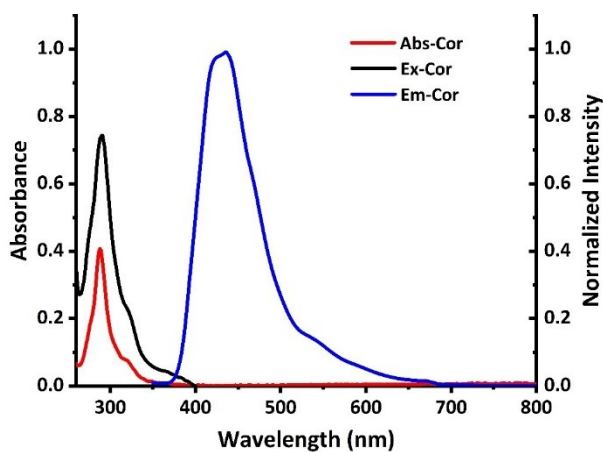

**Fig. S5** Absorbance, normalized excitation and emission spectra of corannulene ( $\sim 10 \mu\text{M}$ ) in DCM.

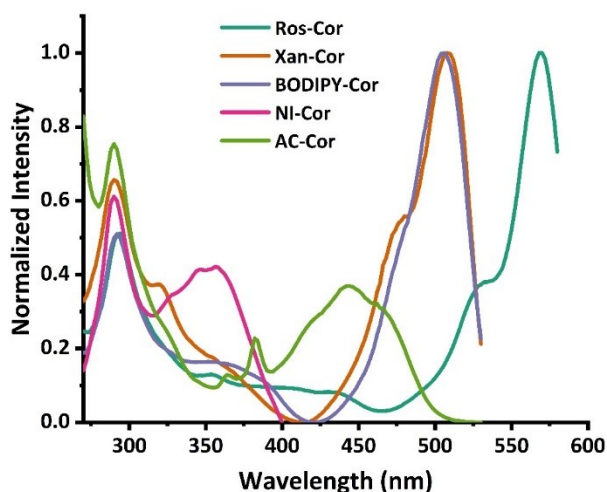

**Fig. S6** Normalized excitation spectra (X-axis set so that include corannulene excitation) of the **X-Cor** conjugates ( $\sim 10 \mu\text{M}$ ) in MeOH.

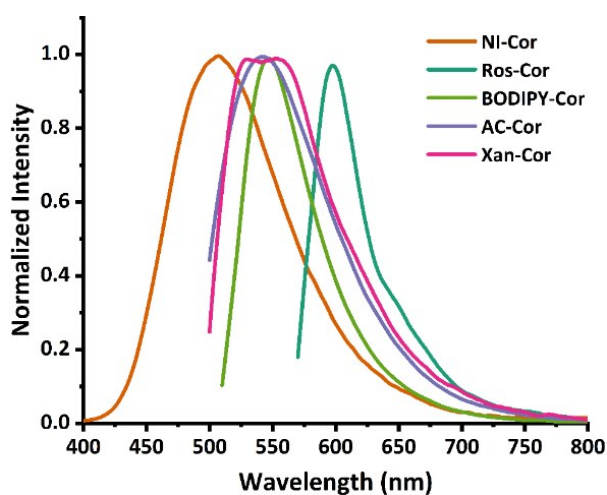

**Fig. S7** Normalized emission spectra of the **X-Cor** conjugates ( $\sim 10 \mu\text{M}$ ) in MeOH while exciting at 292 nm (corannulene excitation).

**Table S2** Optical properties of **X-Cor** conjugates at different  $\lambda(\text{exc})$ .<sup>a,b</sup>

|                   | $\lambda(\text{exc})$ | $\lambda_{\text{max}}(\text{em})$ | $\phi$ | Stokes shift |
|-------------------|-----------------------|-----------------------------------|--------|--------------|
| <b>Ros-Cor</b>    | 569                   | 598                               | 0.25   | 29           |
|                   | 292                   | 599                               | 0.21   | 307          |
| <b>Xan-Cor</b>    | 490                   | 540                               | 0.31   | 50           |
|                   | 292                   | 540                               | 0.25   | 248          |
| <b>BODIPY-Cor</b> | 506                   | 542                               | 0.73   | 36           |
|                   | 292                   | 540                               | 0.71   | 248          |
| <b>AC-Cor</b>     | 444                   | 542                               | 0.94   | 98           |
|                   | 292                   | 542                               | 0.94   | 250          |
| <b>NI-Cor</b>     | 355                   | 502                               | 0.63   | 147          |
|                   | 292                   | 502                               | 0.71   | 210          |

<sup>a</sup>All measurements made at  $\sim 10^{-5}$  M in  $\text{CH}_3\text{OH}$ . <sup>b</sup> $\lambda$  values in nm.

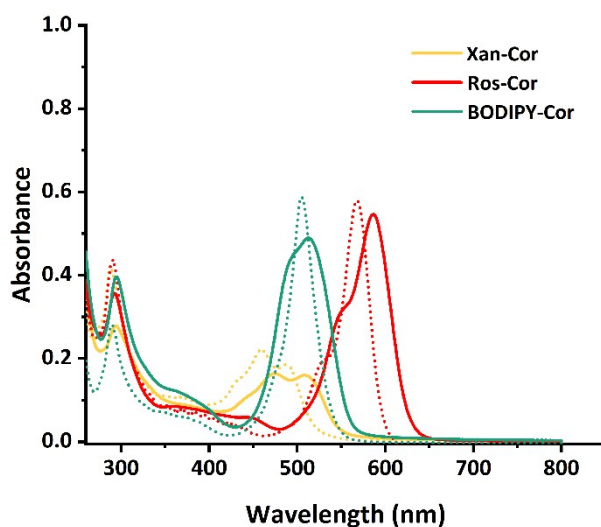

**Fig. S8** UV/Vis absorption of **X-Cor** conjugates ( $\sim 10 \mu\text{M}$ ) in aqueous media (solid lines, water/DMSO, v/v 99:1) and in MeOH (dashed lines)

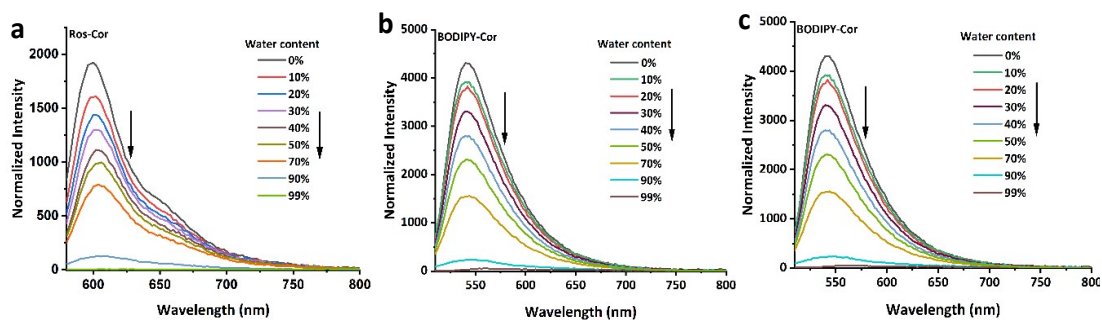

**Fig. S9** Fluorescence spectra of **X-Cor** conjugates ( $\sim 10 \mu\text{M}$ ) in MeOH-containing water with increasing water content (0% to 99%, v/v)

**Table S3** Optical properties of **X-Cor** conjugates in MeOH and water<sup>a,b</sup>

|                   | Solvent | $\lambda_{\text{max}}(\text{abs})$ | $\epsilon^c$ | $\lambda_{\text{max}}(\text{em})$ | $\phi$ |
|-------------------|---------|------------------------------------|--------------|-----------------------------------|--------|
| <b>Ros-Cor</b>    | MeOH    | 569                                | 5.82         | 598                               | 0.25   |
|                   | water   | 583                                | 5.46         | 602                               | 0.02   |
| <b>Xan-Cor</b>    | MeOH    | 490                                | 1.84         | 540                               | 0.31   |
|                   | water   | 502                                | 1.66         | 543                               | 0.01   |
| <b>BODIPY-Cor</b> | MeOH    | 506                                | 5.86         | 542                               | 0.73   |
|                   | water   | 514                                | 5.46         | 548                               | 0.06   |

<sup>a</sup>All measurements made at  $\sim 10^{-5}$  M. <sup>b</sup> $\lambda$  values in nm. <sup>c</sup>  $(\text{M}^{-1} \text{cm}^{-1}) \times 10^4$ .

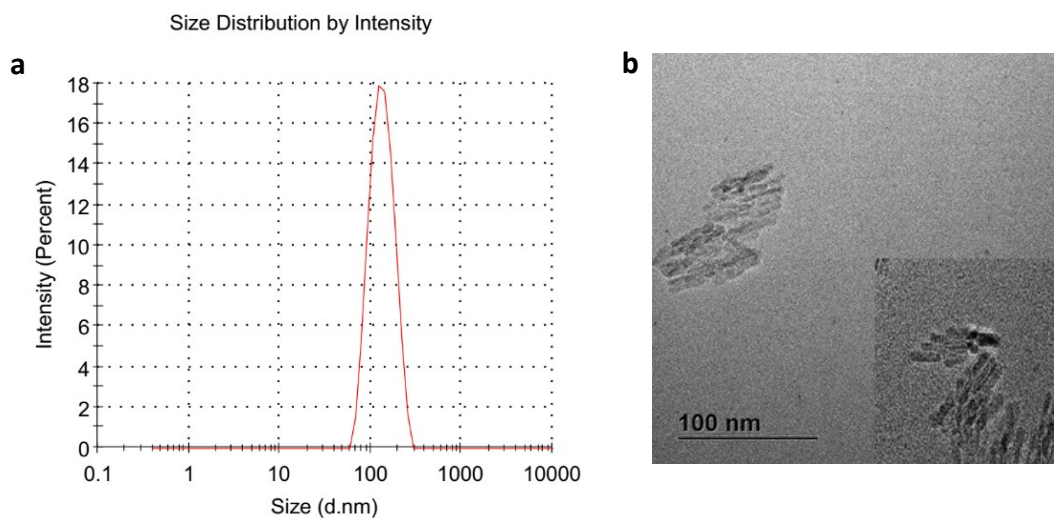

**Fig. S10** DLS particle size distribution plot (a) TEM images (b) of **Ros-Cor** in aqueous solution. The nanoaggregate was prepared by injecting the concentrated solution of corresponding compounds in DMSO into water. The final concentration is  $\sim 0.5 \times 10^{-4}$  M, and the proportion of DMSO in water is 1 vol %.

## 4. Cell Viability Assay

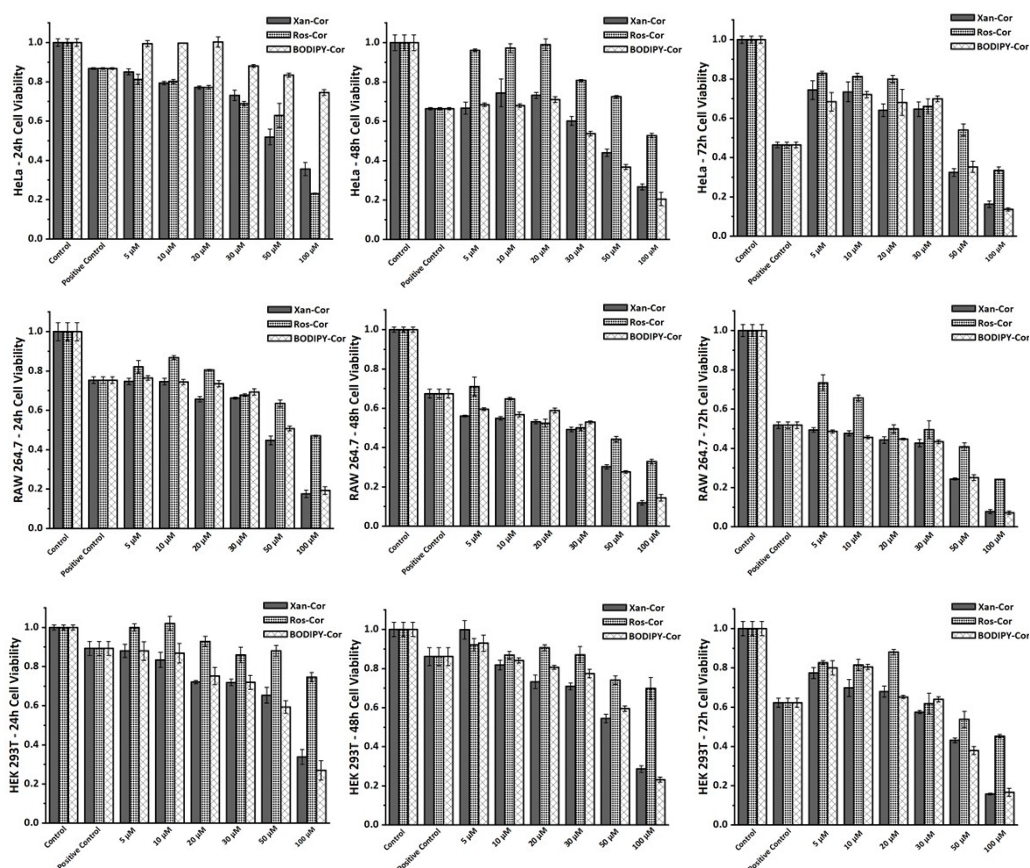

**Fig. S11** Cell toxicity effect of X-Cor conjugates to HeLa, HEK 293T, and RAW 264.7 cell lines. Cells were incubated with these probes (0 - 100  $\mu$ M) for 24 h, 48 h, 72 h respectively. Results are mean  $\pm$  SD,  $n = 5$ . Control experiments were performed in the cell culture medium only. Positive Control experiments were performed in the cell culture medium contained 1% DMSO without any probes.



## 5. Confocal Fluorescence Imaging

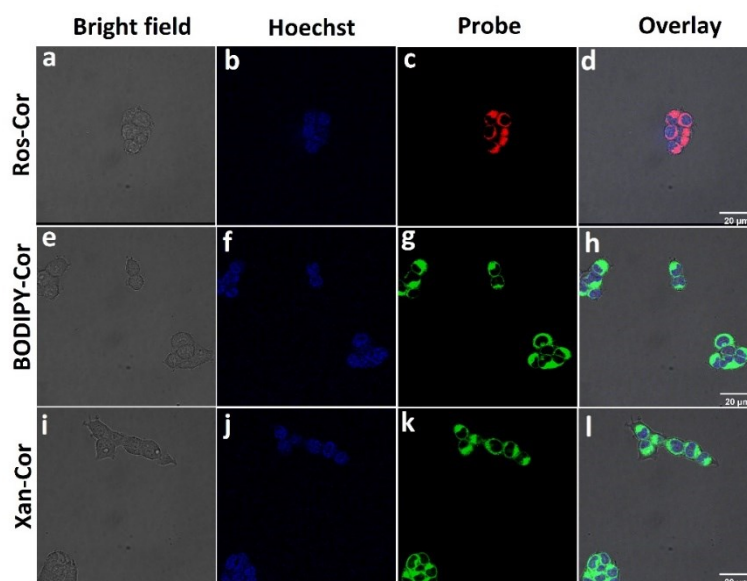

**Fig. S12** Confocal fluorescence images of HEK 293T cells stained with Hoechst (1 μM) and **X-Cor** conjugates (5 μM). Column 1: Bright field images (a, e, i). Column 2: Hoechst staining (b, f, j; blue channel:  $\lambda_{\text{ex}} = 405 \text{ nm}$ ,  $\lambda_{\text{em}} = 430 - 450 \text{ nm}$ ). Column 3: **Ros-Cor** (c; red channel:  $\lambda_{\text{ex}} = 552 \text{ nm}$ ,  $\lambda_{\text{em}} = 600 - 620 \text{ nm}$ ); **BODIPY-Cor** (g; green channel:  $\lambda_{\text{ex}} = 488 \text{ nm}$ ,  $\lambda_{\text{em}} = 530 - 550 \text{ nm}$ ); **Xan-Cor** (k; green channel,  $\lambda_{\text{ex}} = 488 \text{ nm}$ ,  $\lambda_{\text{em}} = 530 - 550 \text{ nm}$ ). Column 4: Merged images (d, h, g). Scar bar: 20 μm.

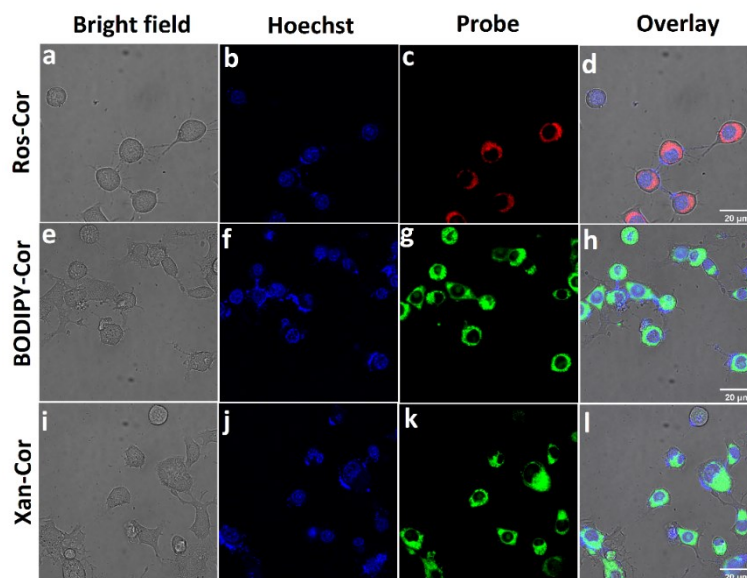

**Fig. S13** Confocal fluorescence images of RAW 264.7 cells stained with Hoechst (1 μM) and **X-Cor** conjugates (5 μM). Column 1: Bright field images (a, e, i). Column 2: Hoechst staining (b, f, j; blue channel:  $\lambda_{\text{ex}} = 405 \text{ nm}$ ,  $\lambda_{\text{em}} = 430 - 450 \text{ nm}$ ). Column 3: **Ros-Cor** (c; red channel:  $\lambda_{\text{ex}} = 552 \text{ nm}$ ,  $\lambda_{\text{em}} = 600 - 620 \text{ nm}$ ); **BODIPY-Cor** (g; green channel:  $\lambda_{\text{ex}} =$



488 nm,  $\lambda_{em} = 530 - 550$  nm); **Xan-Cor** (k; green channel,  $\lambda_{ex} = 488$  nm,  $\lambda_{em} = 530 - 550$  nm). Column 4: Merged images (d, h, g). Scar bar: 20  $\mu$ m.

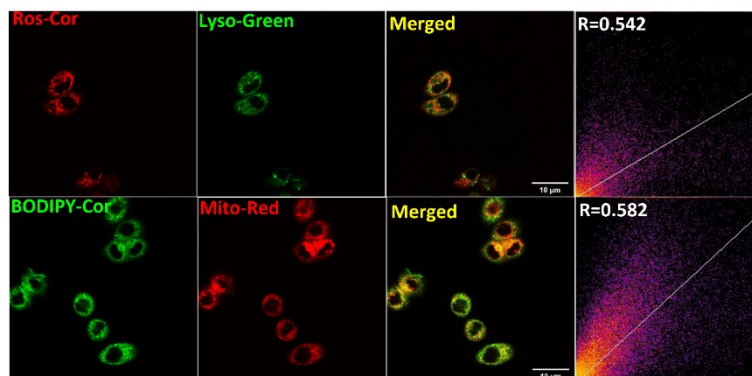

**Fig. S14** Confocal fluorescence images of HeLa cells stained with **Ros-Cor** (1  $\mu$ M, Red channel:  $\lambda_{ex} = 552$  nm,  $\lambda_{em} = 610 - 620$  nm); LysoTracker Green (100 nm, green channel:  $\lambda_{ex} = 488$  nm,  $\lambda_{em} = 500 - 510$  nm). BODIPY-Cor (1  $\mu$ M, Green channel:  $\lambda_{ex} = 488$  nm,  $\lambda_{em} = 530 - 540$  nm); MitoTracker Red (100 nM, red channel:  $\lambda_{ex} = 552$  nm,  $\lambda_{em} = 600 - 610$  nm). Scale bar: 10  $\mu$ m.

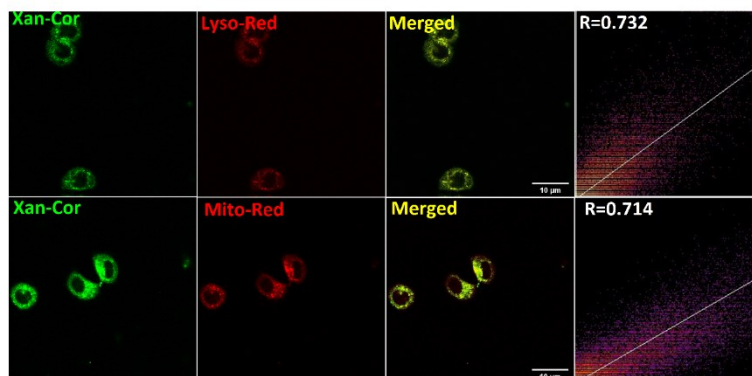

**Fig. S15** Confocal fluorescence images of HeLa cells stained with **Xan-Cor** (1  $\mu$ M, green channel:  $\lambda_{ex} = 488$  nm,  $\lambda_{em} = 530-540$ nm); MitoTracker Red (100 nm,  $\lambda_{ex} = 552$  nm,  $\lambda_{em} = 600-610$  nm). LysoTracker Red (100 nm, Red channel:  $\lambda_{ex} = 552$  nm,  $\lambda_{em} = 600-610$  nm). Scale bar: 10  $\mu$ m.

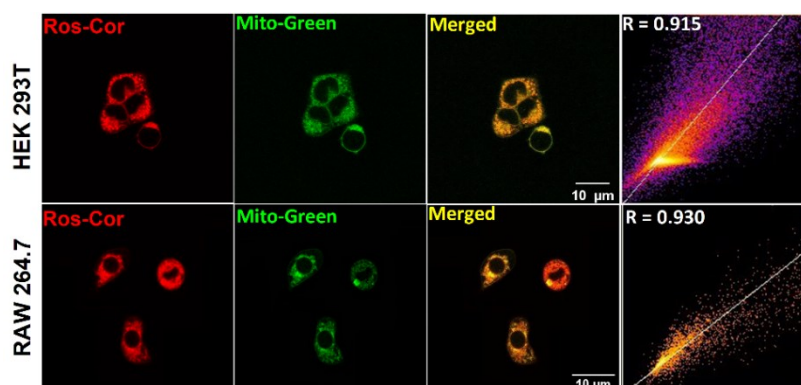

**Fig. 16** Confocal fluorescence images of **Ros-Cor** (1  $\mu$ M, Red channel:  $\lambda_{ex}$  = 552 nm,  $\lambda_{em}$  = 610 -620 nm); MitoTracker Green (100 nM, green channel:  $\lambda_{ex}$  = 488 nm,  $\lambda_{em}$  = 500–510 nm) in HEK 293T and RAW 267.4 cells. Scale bar: 10  $\mu$ m.

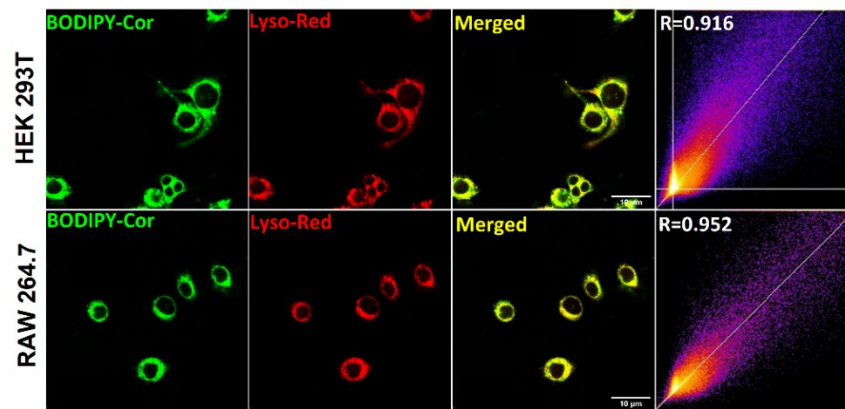

**Fig. S17** Confocal fluorescence images of **BODIPY-Cor** (1  $\mu$ M, Green channel:  $\lambda_{ex}$  = 488 nm,  $\lambda_{em}$  = 530-540 nm); LysoTracker Red (100 nM, red channel:  $\lambda_{ex}$  = 552 nm,  $\lambda_{em}$  = 600–610 nm) in HEK 293T and RAW 267.4 cells. Scale bar: 10  $\mu$ m.

## 6. X-Ray Crystal Data

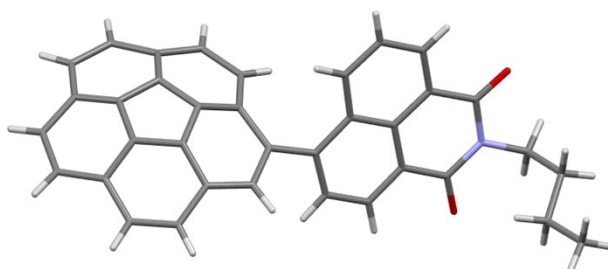

**Fig. S18** Single-crystal X-ray diffraction structures of **NI-Cor**. Thermal ellipsoids set to 50 % probability.

**Table S4** Crystal data and structure refinement for **NI-Cor**

| Identification code                | <b>NI-Cor</b>                                                 |
|------------------------------------|---------------------------------------------------------------|
| Empirical formula                  | C <sub>36</sub> H <sub>23</sub> NO <sub>2</sub>               |
| Formula weight                     | 501.55                                                        |
| Temperature/K                      | 100.00(10)                                                    |
| Crystal system                     | orthorhombic                                                  |
| Space group                        | <i>Pbca</i>                                                   |
| a/Å                                | 17.1874(5)                                                    |
| b/Å                                | 7.5058(3)                                                     |
| c/Å                                | 37.0743(18)                                                   |
| α/°                                | 90                                                            |
| β/°                                | 90                                                            |
| γ/°                                | 90                                                            |
| Volume/Å <sup>3</sup>              | 4782.8(3)                                                     |
| Z                                  | 8                                                             |
| ρ <sub>calc</sub> /cm <sup>3</sup> | 1.393                                                         |
| μ/mm <sup>-1</sup>                 | 0.674                                                         |
| F(000)                             | 2096                                                          |
| Crystal size/mm <sup>3</sup>       | 0.3 × 0.2 × 0.05                                              |
| Radiation                          | CuKα (λ = 1.54184)                                            |
| 2θ range for data collection/°     | 7.014 to 153.044                                              |
| Index ranges                       | -21 ≤ h ≤ 14, -9 ≤ k ≤ 9, -42 ≤ l ≤ 46                        |
| Reflections collected              | 15372                                                         |
| Independent reflections            | 4783 [R <sub>int</sub> = 0.0601, R <sub>sigma</sub> = 0.0575] |
| Data/restraints/parameters         | 4783/0/353                                                    |
| Goodness-of-fit on F <sup>2</sup>  | 1.049                                                         |
| Final R indexes [I ≥ 2σ (I)]       | R <sub>1</sub> = 0.0573, wR <sub>2</sub> = 0.1464             |

|                                                |                                  |
|------------------------------------------------|----------------------------------|
| Final R indexes [all data]                     | $R_1 = 0.0770$ , $wR_2 = 0.1606$ |
| Largest diff. peak/hole / $e \text{ \AA}^{-3}$ | 0.36/-0.31                       |

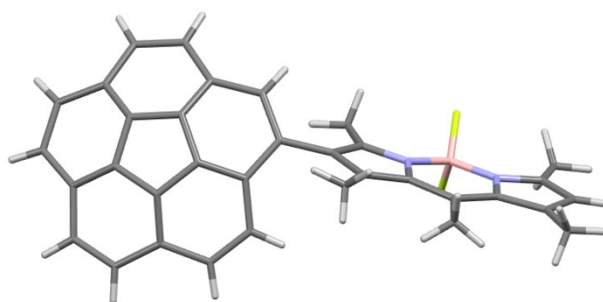

**Fig. S19** Single-crystal X-ray diffraction structures of **BODIPY-Cor**. Thermal ellipsoids set to 50 % probability.

**Table S5** Crystal data and structure refinement for **BODIPY-Cor**

| Identification code                           | <b>BODIPY-Cor</b>                                                |
|-----------------------------------------------|------------------------------------------------------------------|
| Empirical formula                             | $C_{34}H_{25}BF_2N_2$                                            |
| Formula weight                                | 510.37                                                           |
| Temperature/K                                 | 100.00(10)                                                       |
| Crystal system                                | monoclinic                                                       |
| Space group                                   | $P2_1/n$                                                         |
| $a/\text{\AA}$                                | 9.15670(10)                                                      |
| $b/\text{\AA}$                                | 7.75280(10)                                                      |
| $c/\text{\AA}$                                | 34.6394(3)                                                       |
| $\alpha/^\circ$                               | 90                                                               |
| $\beta/^\circ$                                | 91.1160(10)                                                      |
| $\gamma/^\circ$                               | 90                                                               |
| Volume/ $\text{\AA}^3$                        | 2458.59(5)                                                       |
| Z                                             | 4                                                                |
| $\rho_{\text{calc}}/\text{cm}^3$              | 1.379                                                            |
| $\mu/\text{mm}^{-1}$                          | 0.725                                                            |
| F(000)                                        | 1064.0                                                           |
| Crystal size/ $\text{mm}^3$                   | $0.15 \times 0.15 \times 0.1$                                    |
| Radiation                                     | $\text{CuK}\alpha$ ( $\lambda = 1.54184$ )                       |
| $2\theta$ range for data collection/ $^\circ$ | 5.104 to 149.61                                                  |
| Index ranges                                  | $-10 \leq h \leq 11$ , $-9 \leq k \leq 9$ , $-42 \leq l \leq 43$ |
| Reflections collected                         | 24826                                                            |
| Independent reflections                       | 4897 [ $R_{\text{int}} = 0.0376$ , $R_{\text{sigma}} = 0.0280$ ] |
| Data/restraints/parameters                    | 4897/0/357                                                       |
| Goodness-of-fit on $F^2$                      | 1.039                                                            |
| Final R indexes [ $I \geq 2\sigma(I)$ ]       | $R_1 = 0.0414$ , $wR_2 = 0.1074$                                 |
| Final R indexes [all data]                    | $R_1 = 0.0443$ , $wR_2 = 0.1096$                                 |

Largest diff. peak/hole / e Å<sup>-3</sup> 0.28/-0.20

---

## 7. NMR and HRMS Spectra

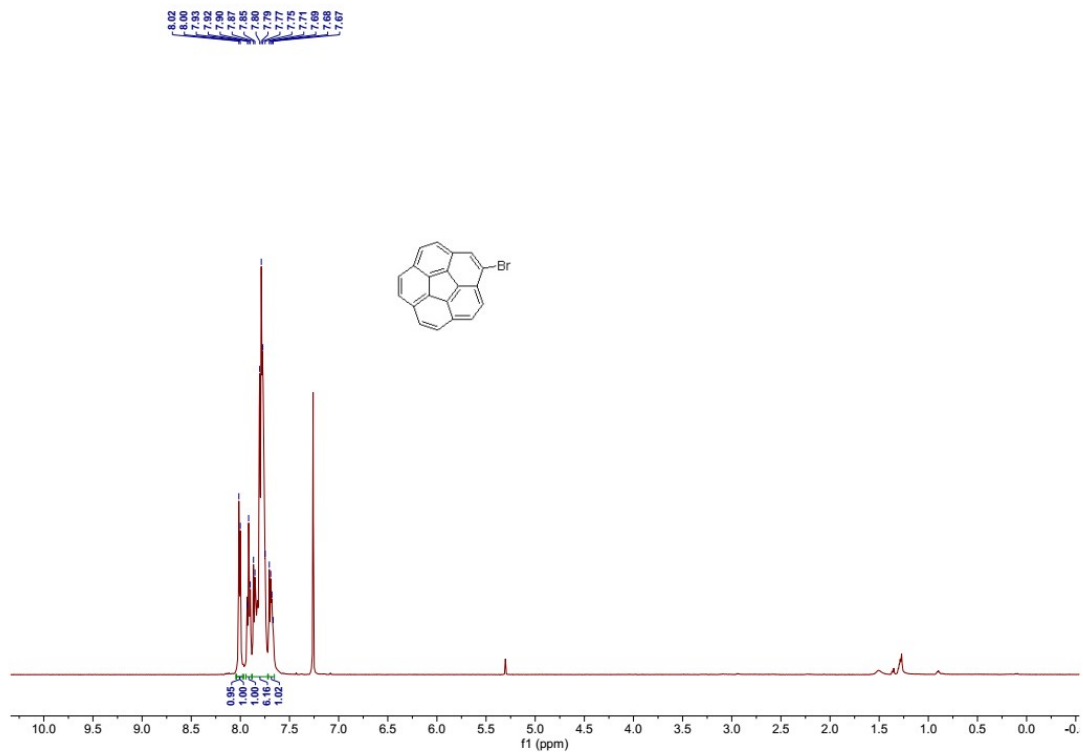



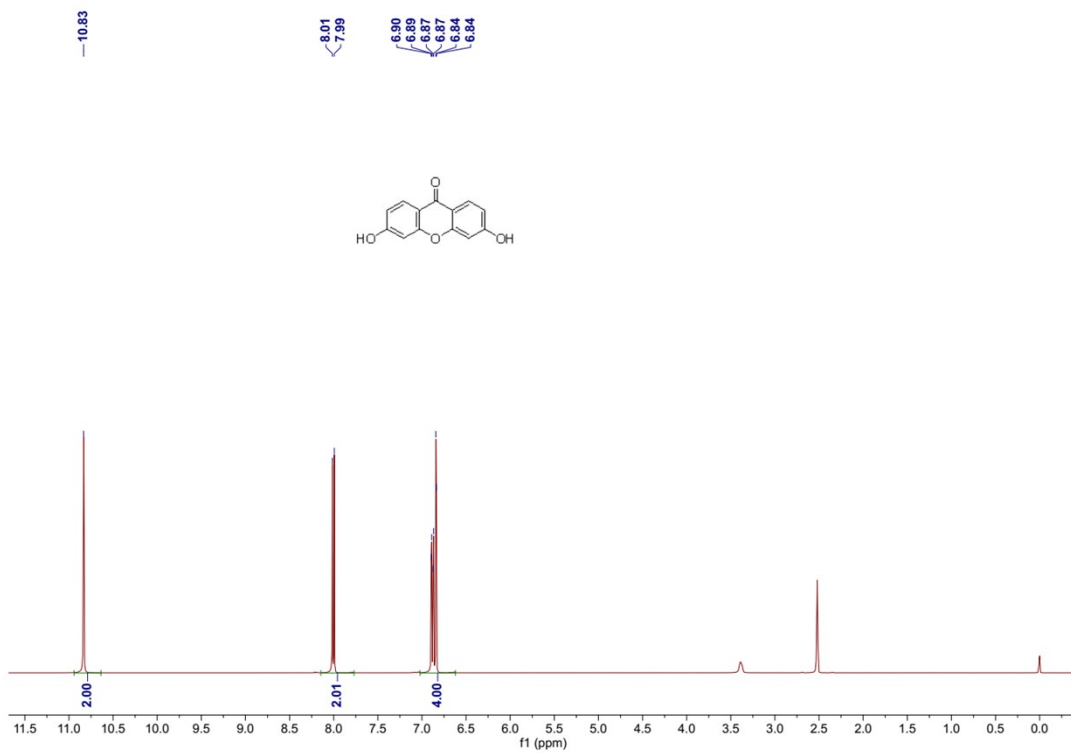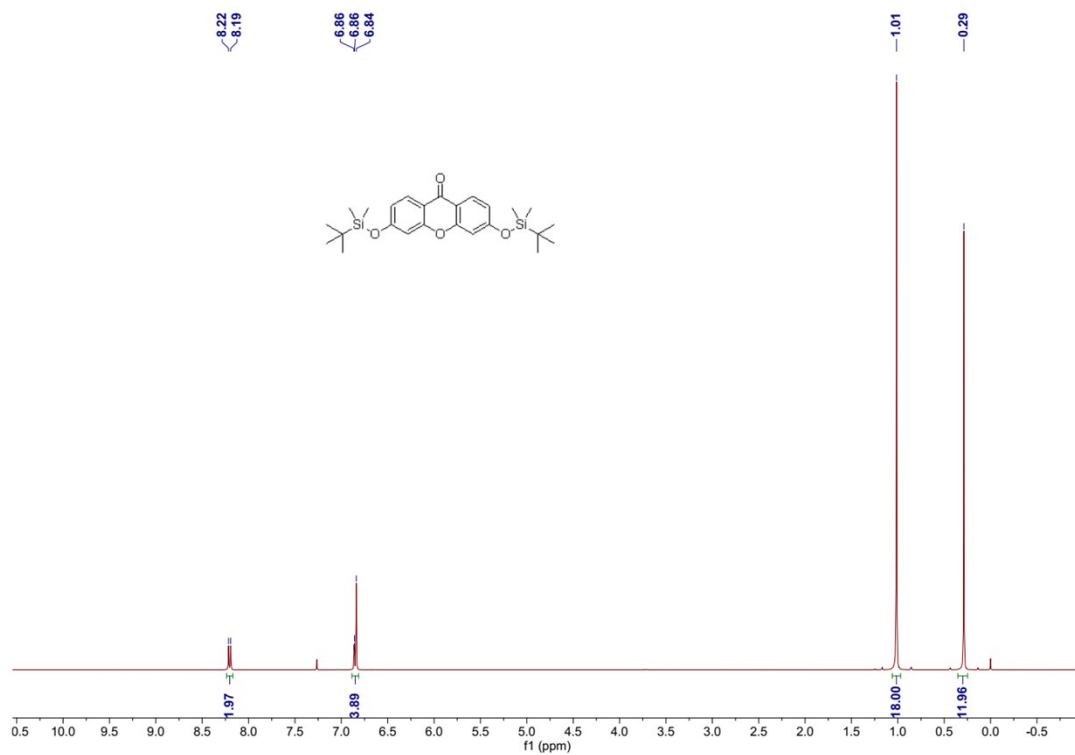

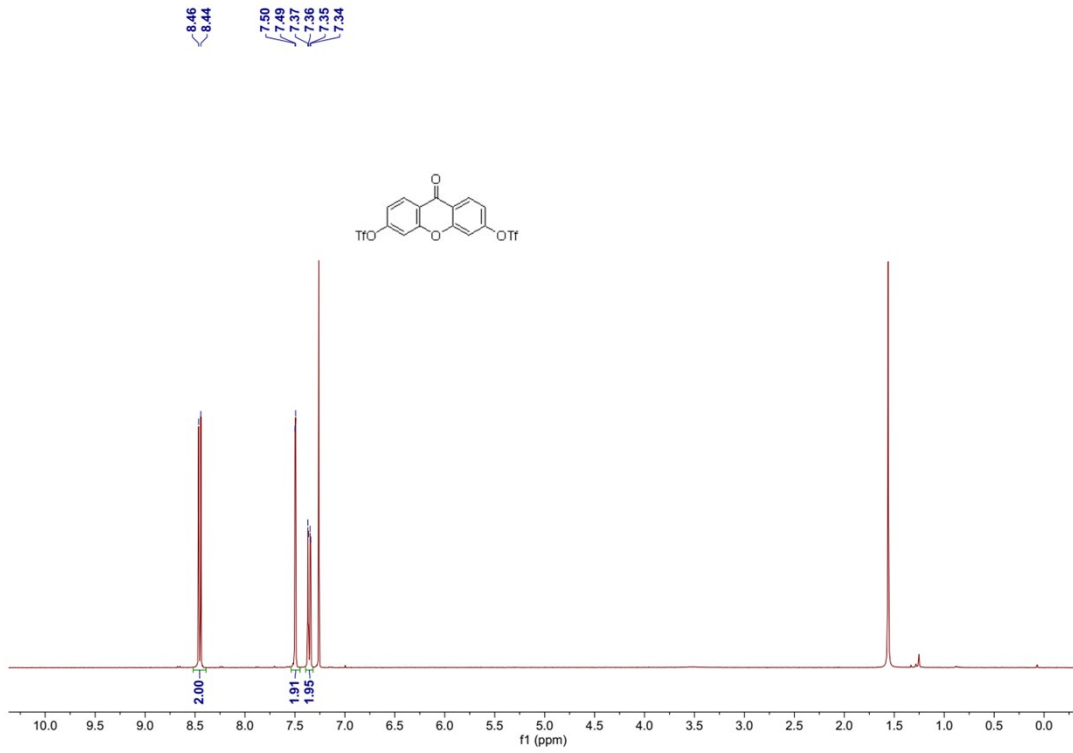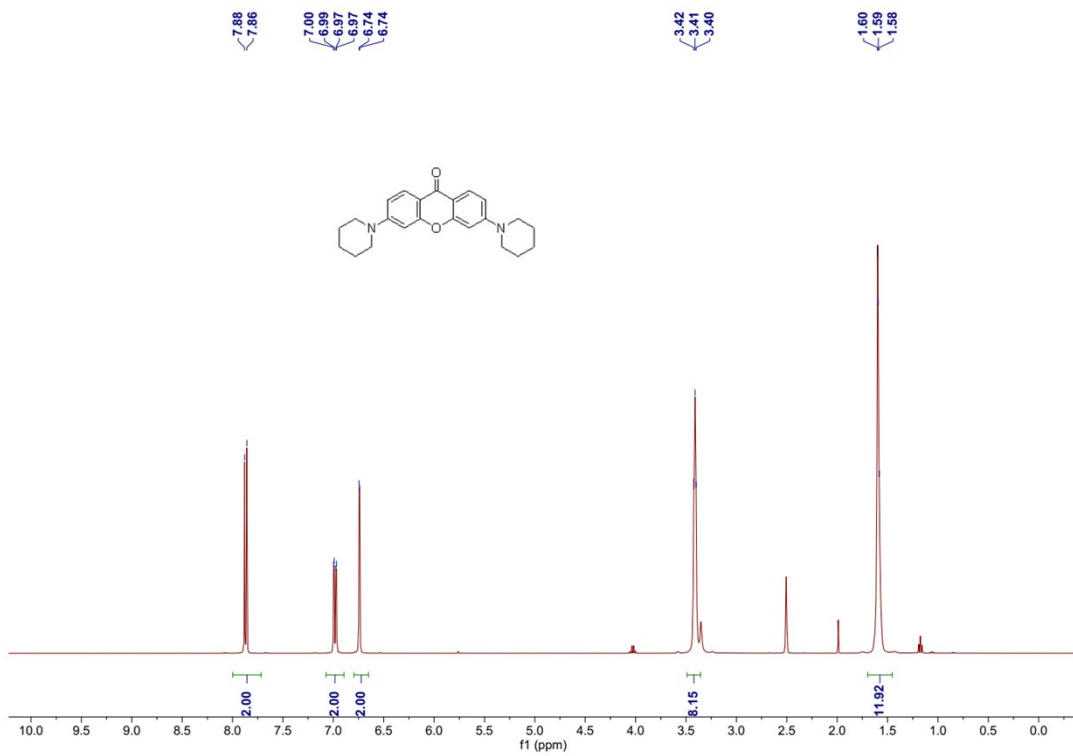



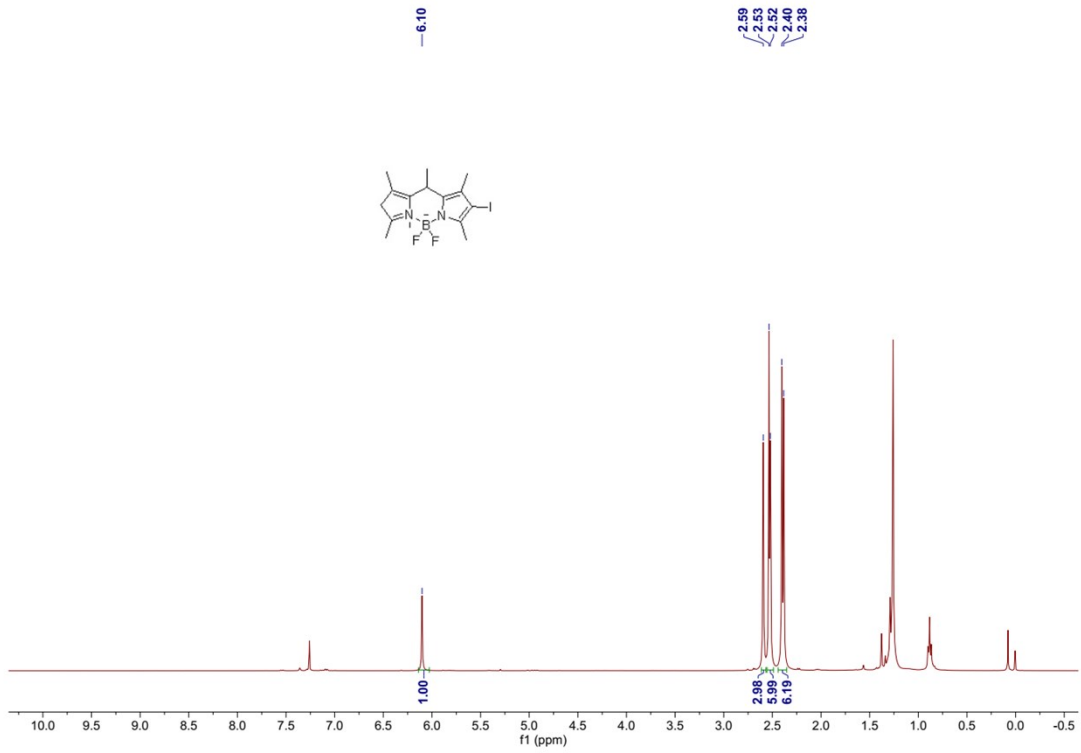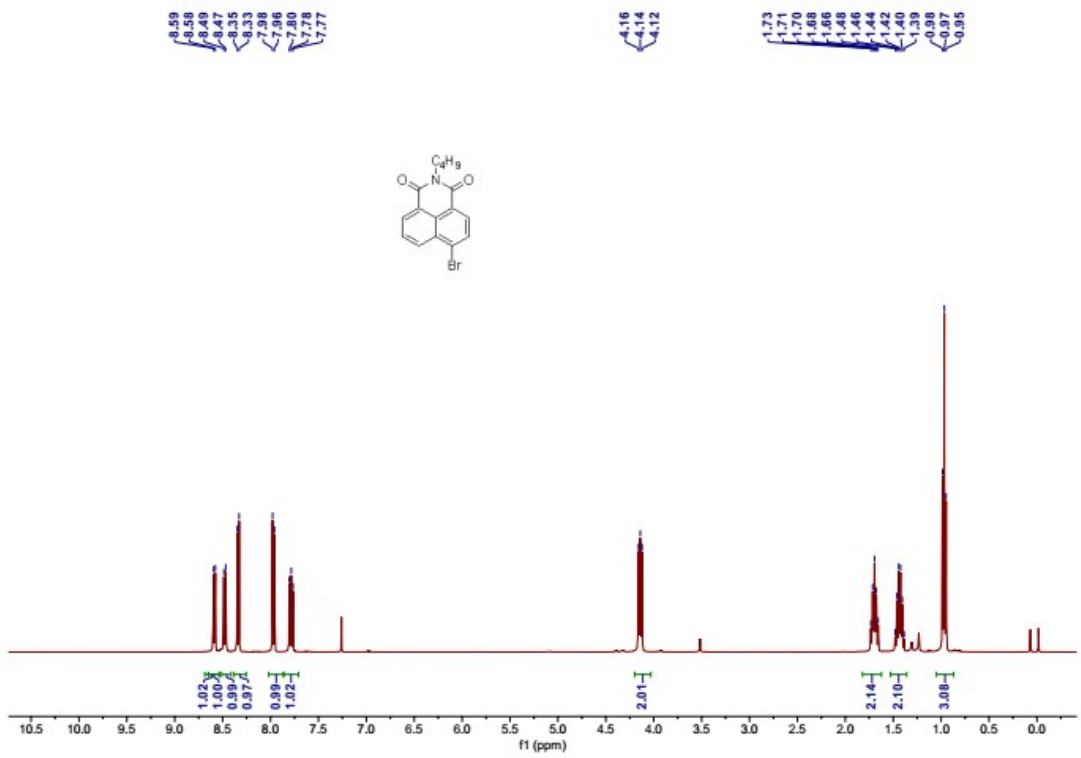



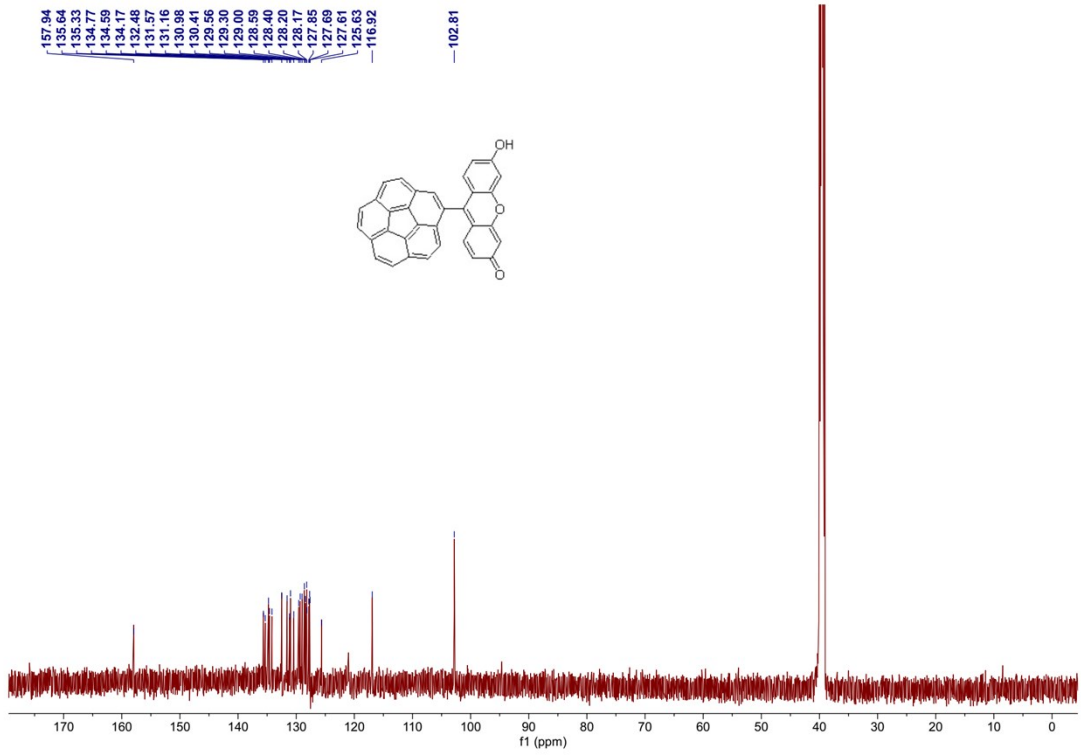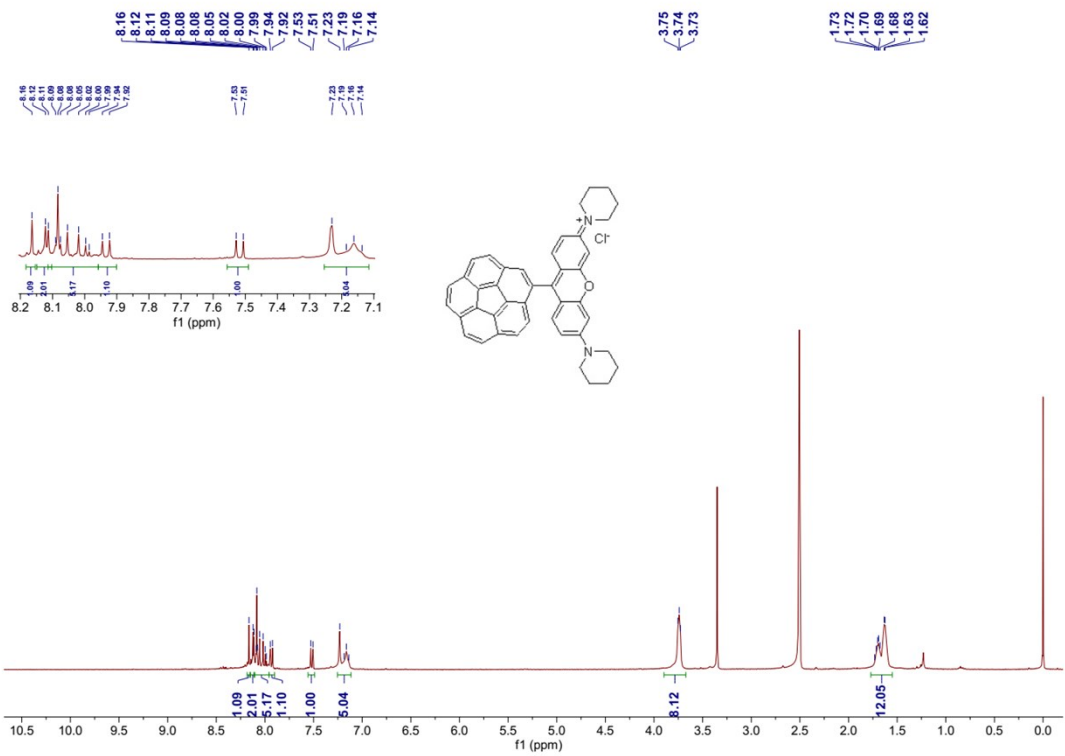

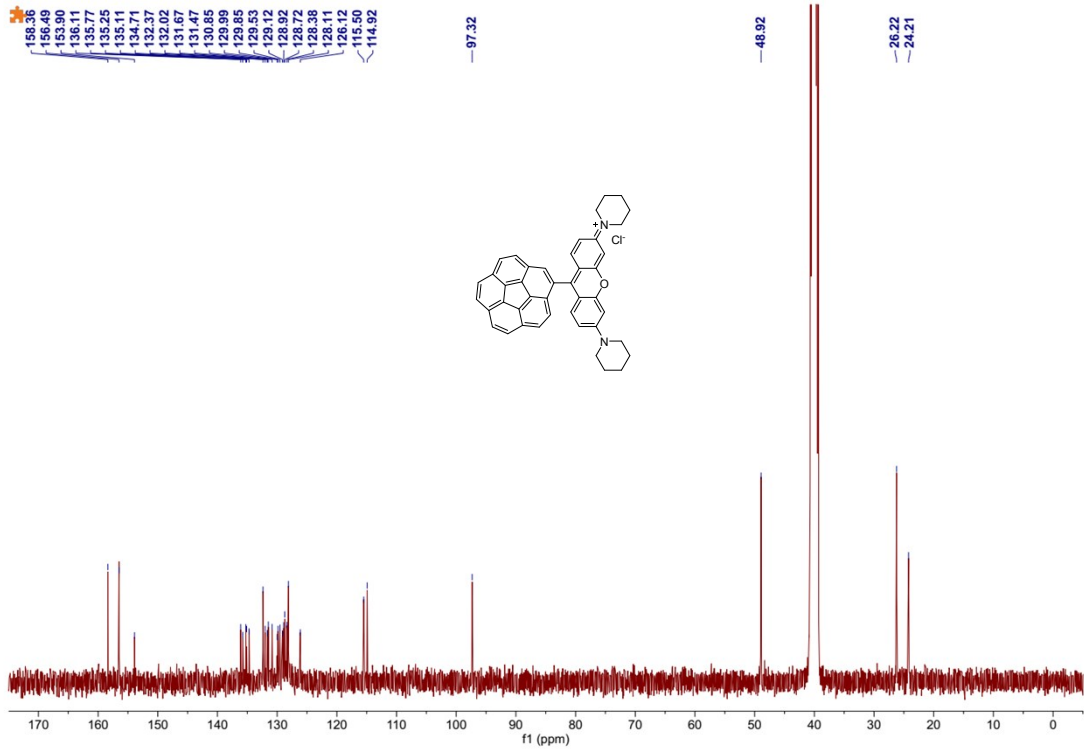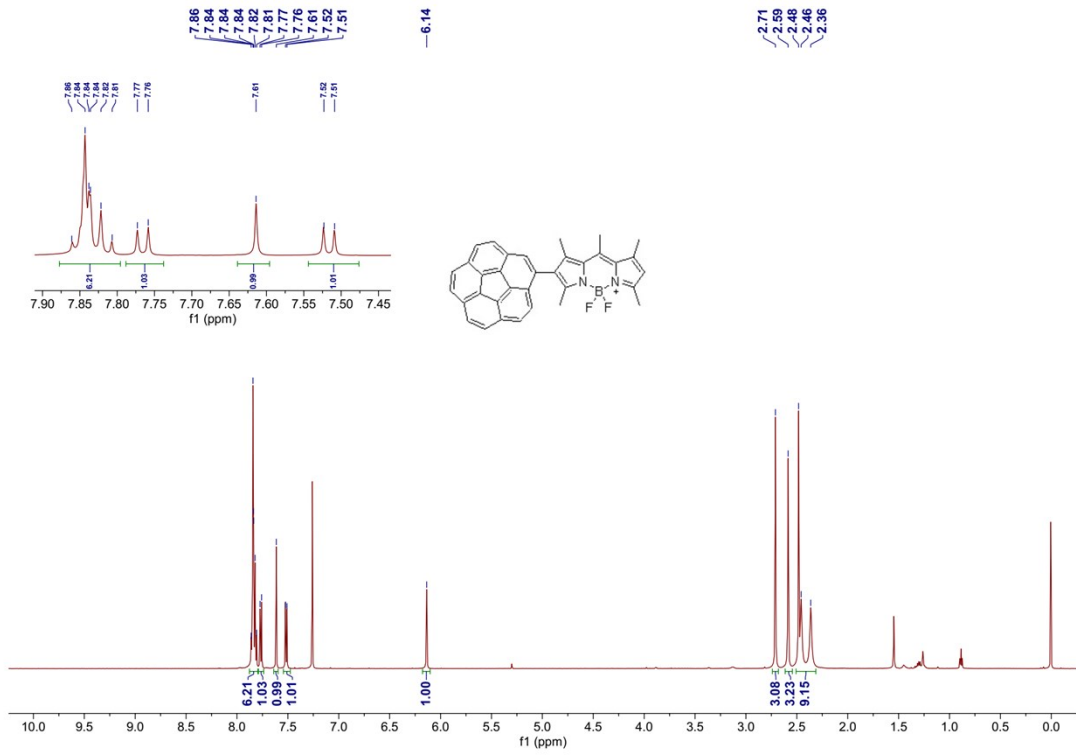

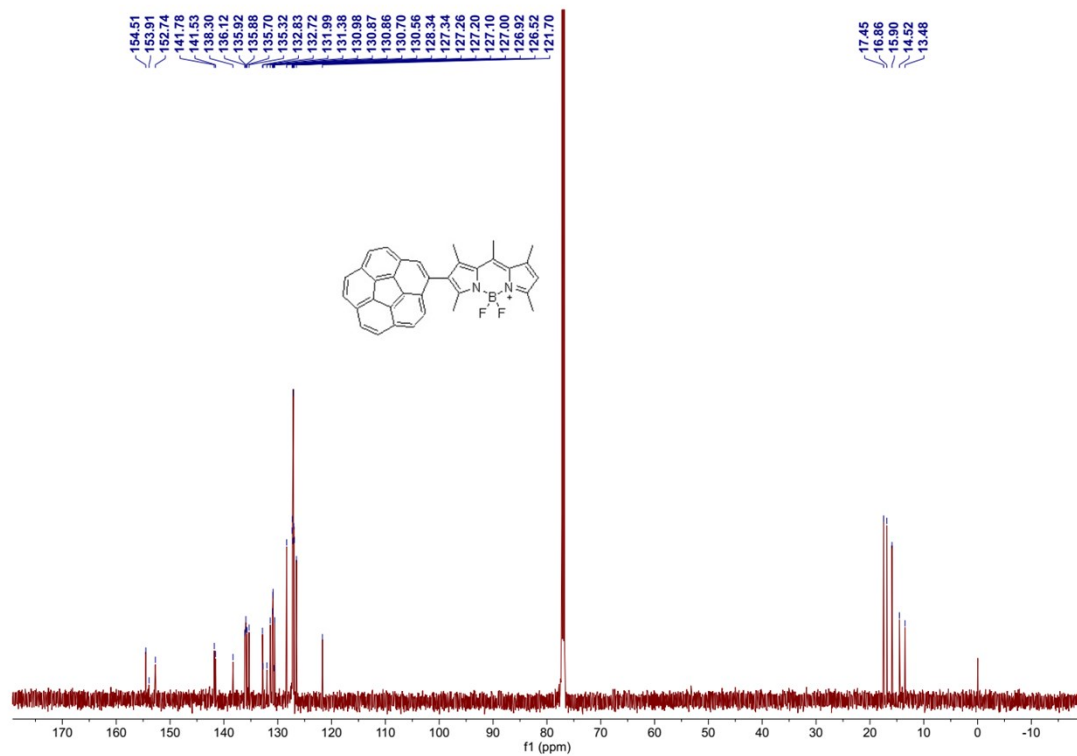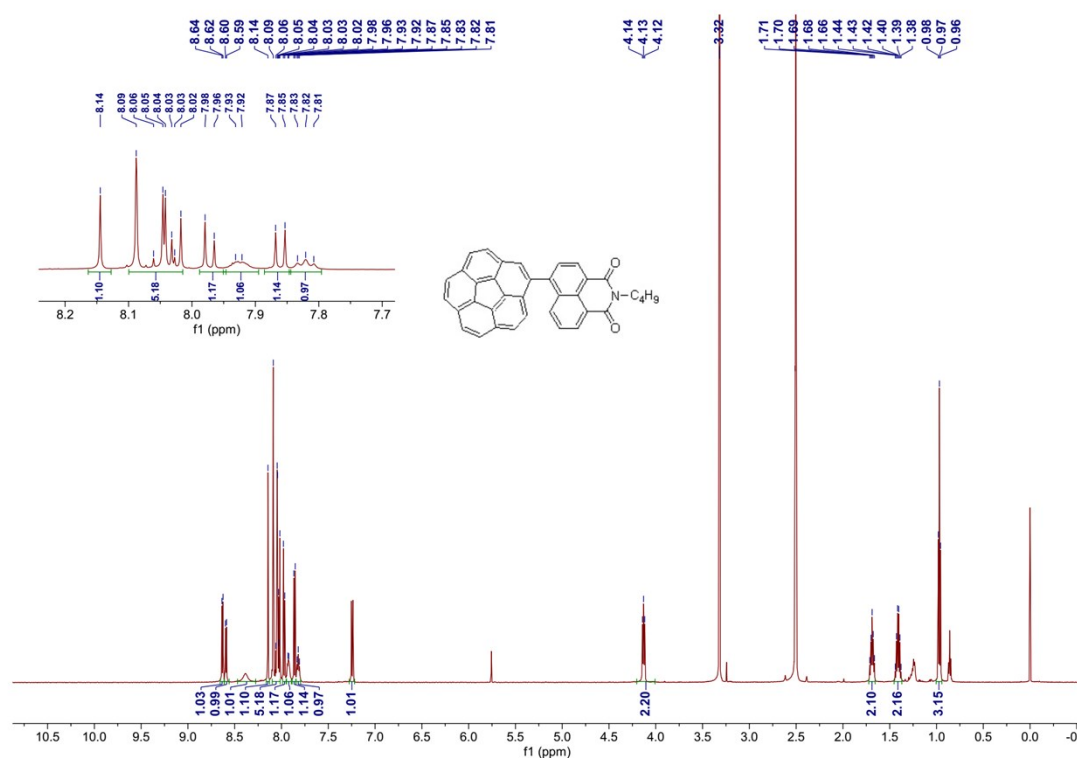

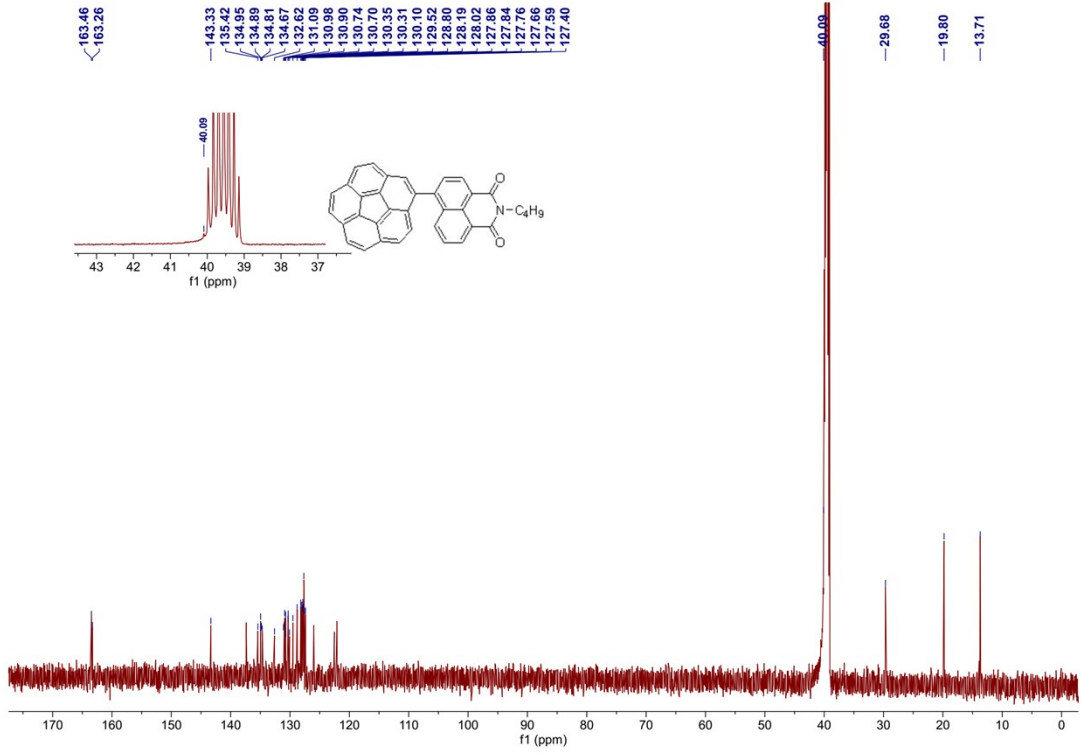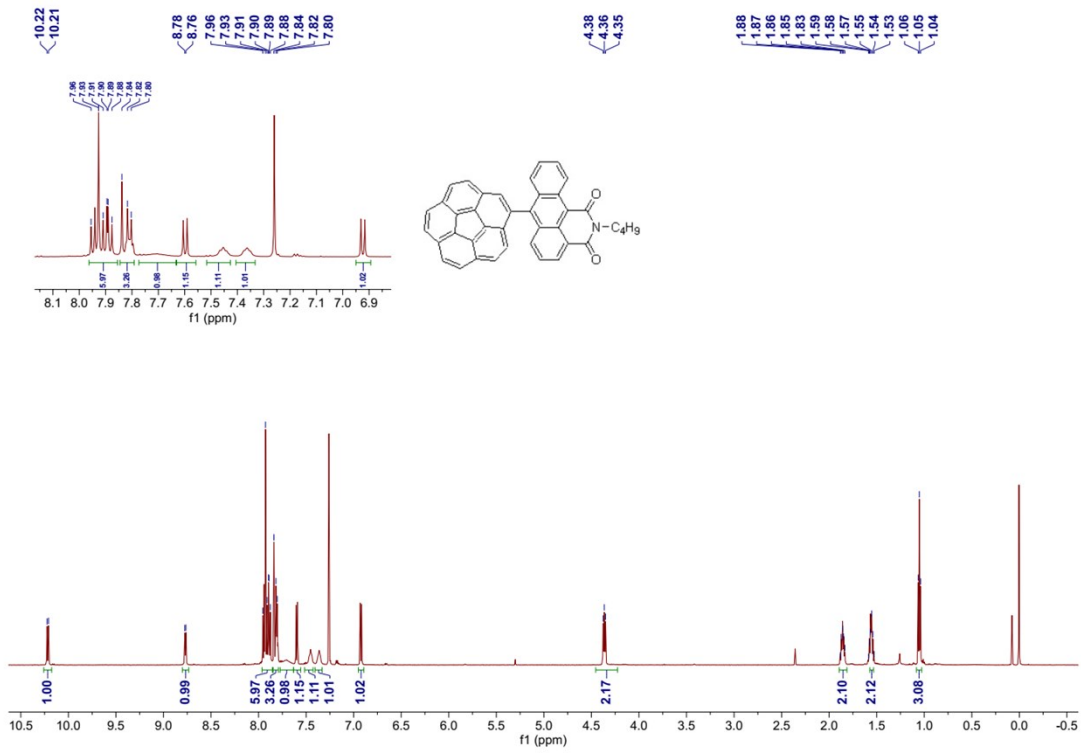

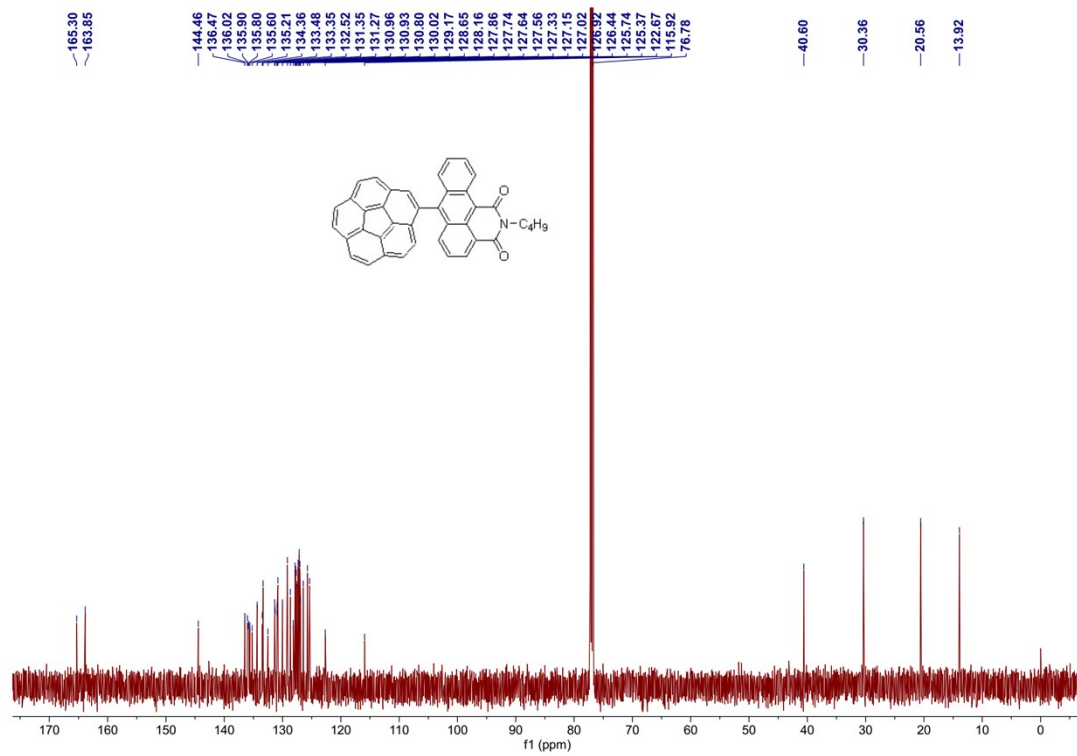

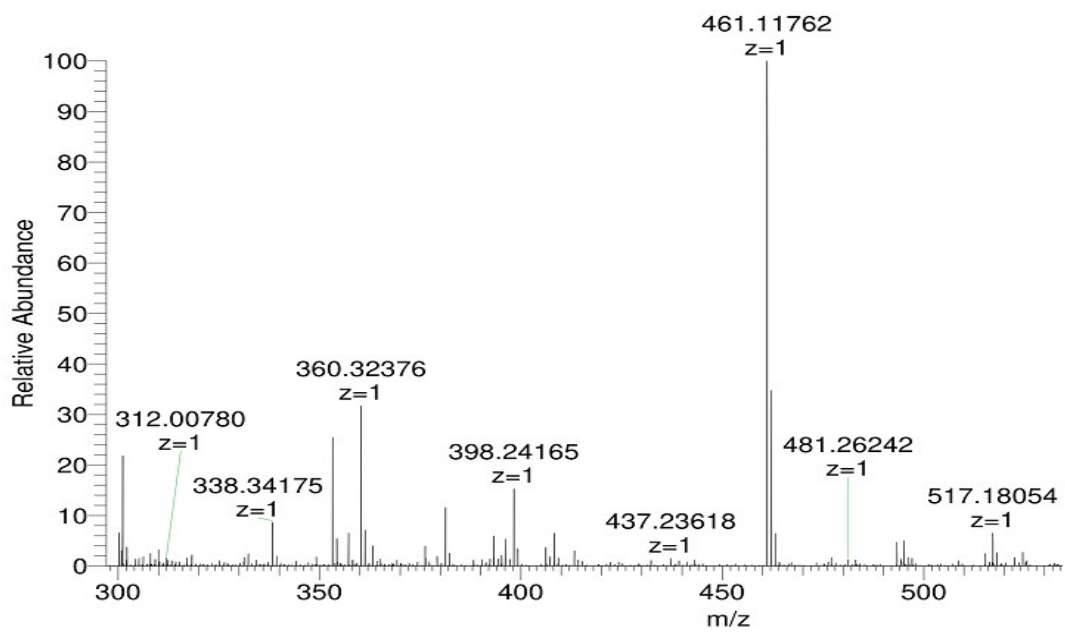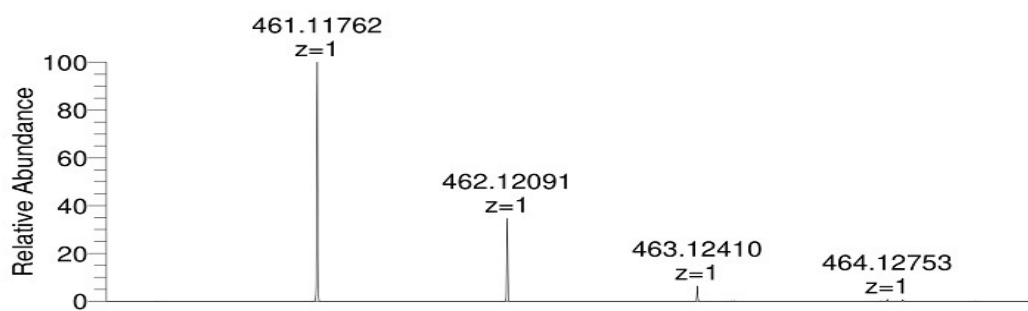

HRMS-ESI spectrum of **10** (Xan-Cor)



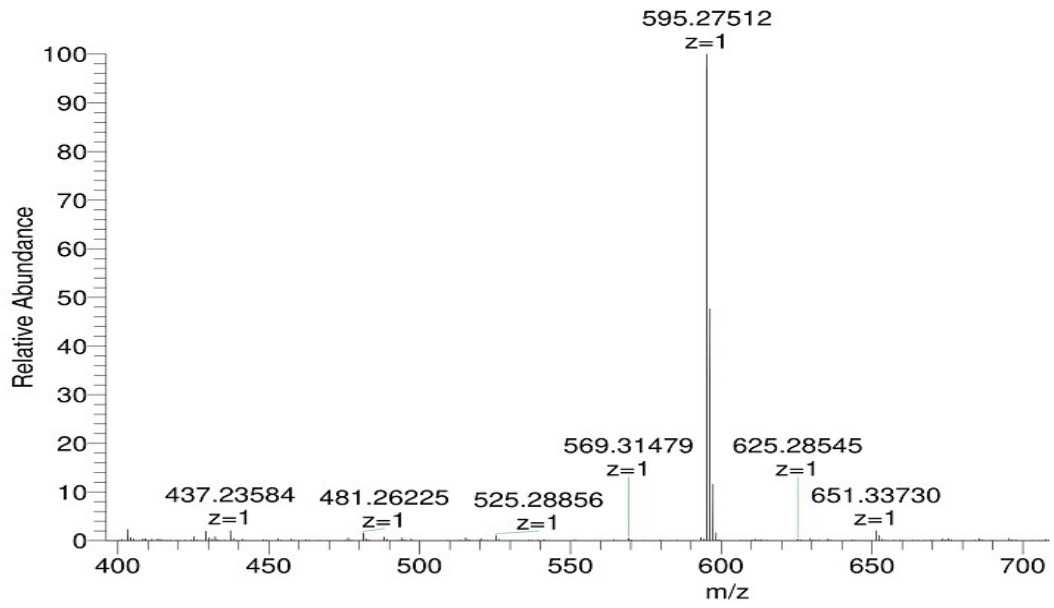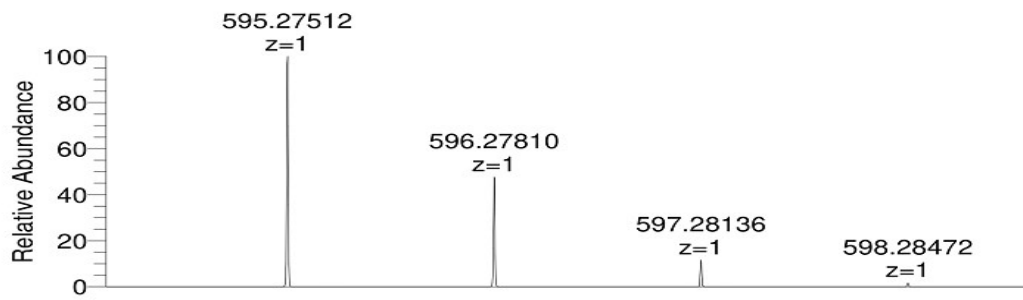

HRMS-ESI spectrum of **11 (Ros-Cor)**

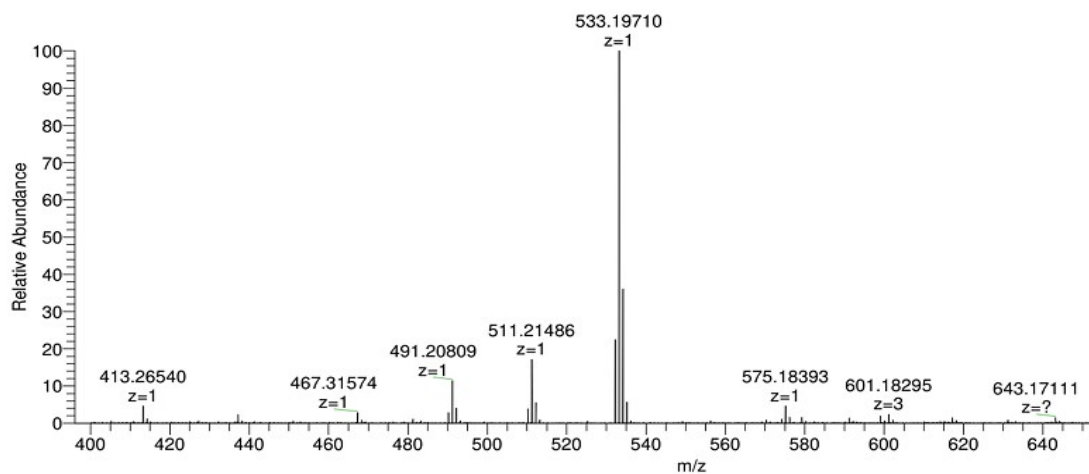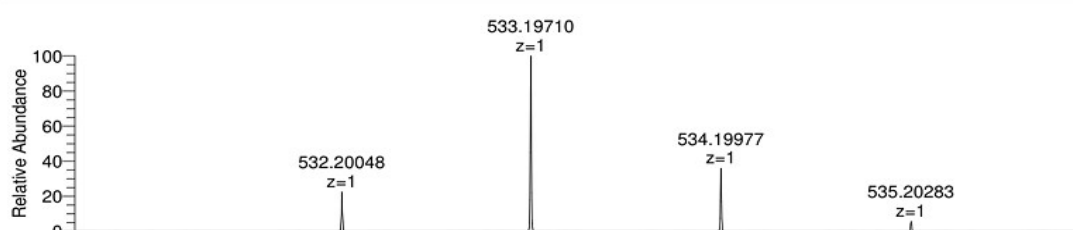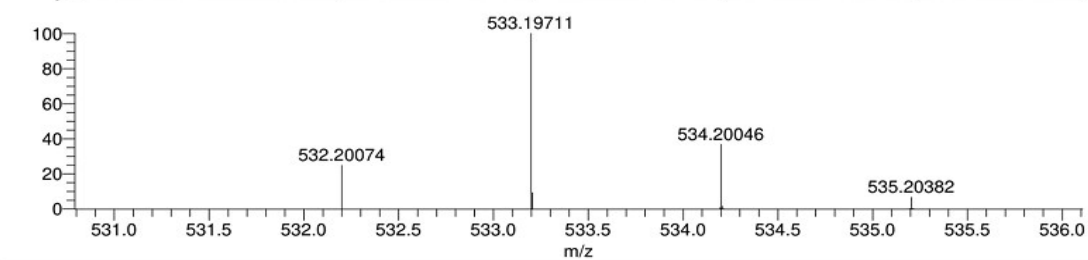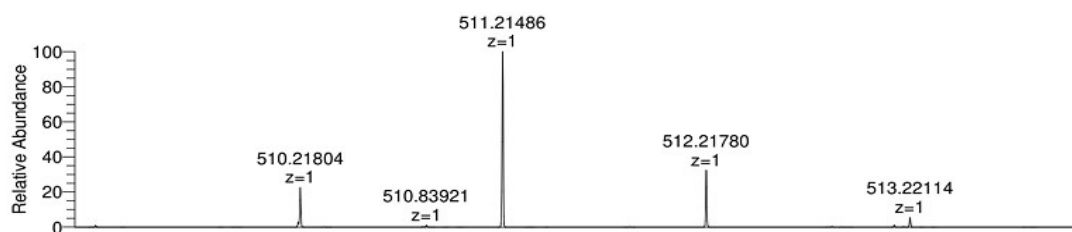

HRMS-ESI spectrum of **12** (BODIPY-Cor)

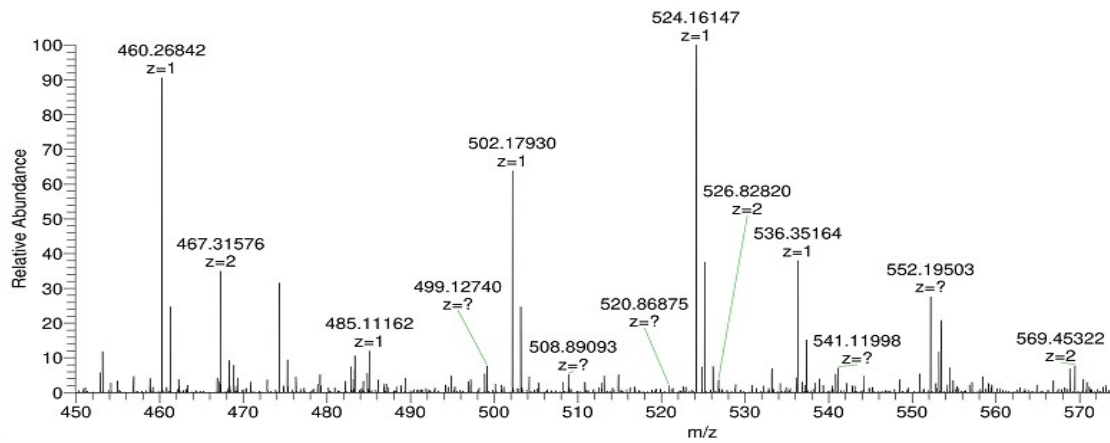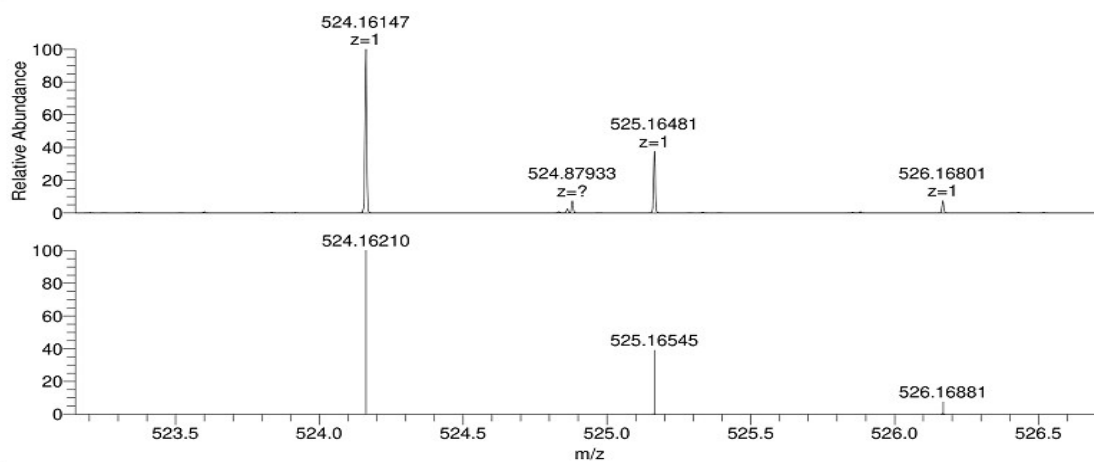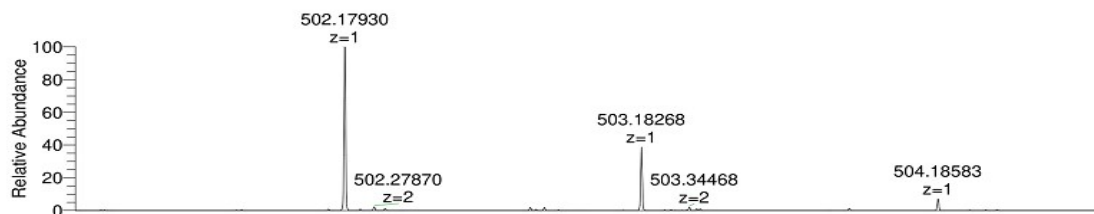

HRMS-ESI spectrum of **13 (NI-Cor)**

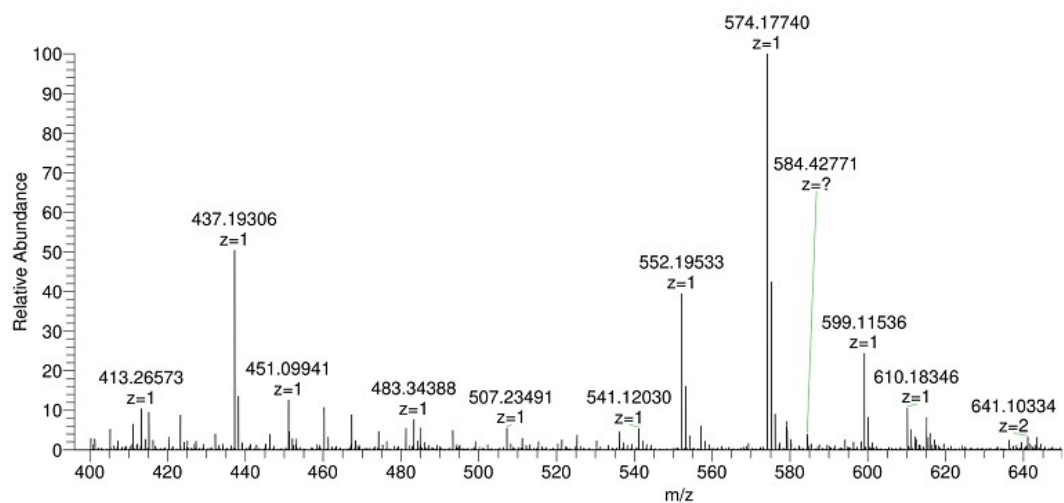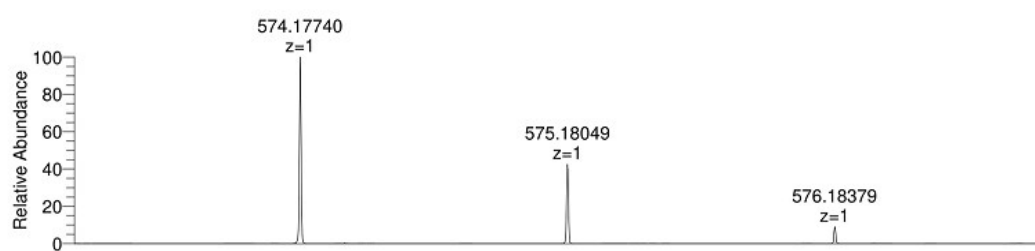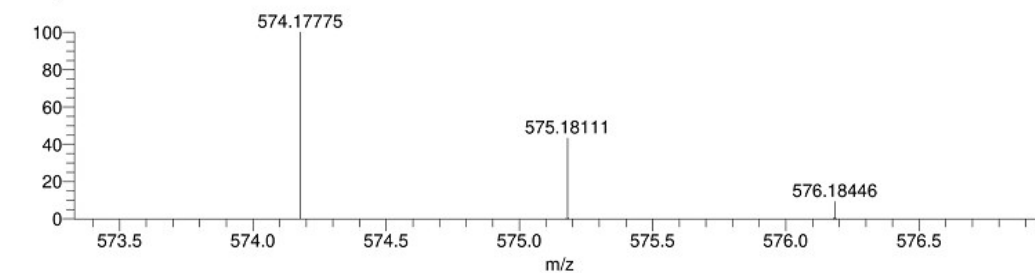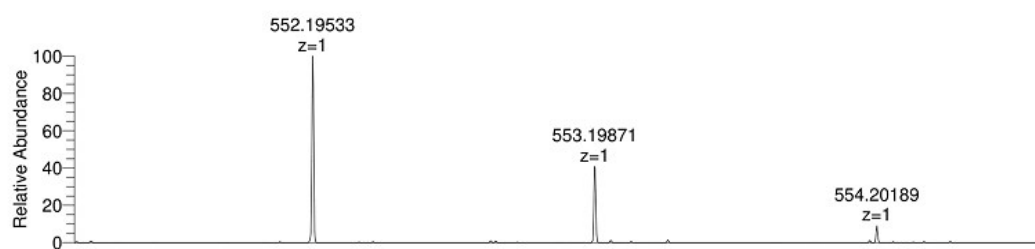

HRMS-ESI spectrum of **14** (AC-Cor)

## ESI References

1. J. Frisch, G. W. Trucks, H. B. Schlegel, and G. E. Scuseria. Gaussian 09, revision D. 01. In Gaussian, Inc., Wallingford CT: 2009.
2. P. J. Stephens, F. J. Devlin, C. F. Chabalowski and M. J. Frisch, *J. Phys. Chem.* 1994, **98**, 11623-11627.
3. S. Grimme, J. Antony, S. Ehrlich and H. Krieg, *J. Chem.Phys.*, 2010, **132**, 154104.
4. P. C. Hariharan and J. A. Pople, *Theor. Chim. Acta*, 1973, **28**, 213-222.
5. W. J. Hehre, R. Ditchfield and J. A. Pople, *J. Phys. Chem. B*, 1972, 56, 2257-2261.
6. A. V. Marenich, C. J. Cramer and D. G. Truhlar, *J. Phys. Chem. B*, 2009, **113**, 6378–6396.
7. T.J. Seiders, E.L. Elliott, G.H. Grube, J.S. Siegel, *J. Am. Chem. Soc.*, 1999, **121** 7804-7813.
8. H.A. Wegner, L.T. Scott, A. de Meijere, *J. Org. Chem.*, 2003, **68** 883-887.
9. X.-J. Zhang, S.-F. Ye, Y. Zhang, H.-Y. Meng, M.-Q. Zhang, W.-L. Gao, et al., *Synth. Commun.*, 2012, **42** 2952-2958.
10. P. Shieh, M.J. Hangauer, C.R. Bertozzi, *J. Am. Chem. Soc.*, 2012, **134** 17428-17431.
11. Y. Zhang, Y. Lv, X. Wang, A. Peng, K. Zhang, X. Jie, et al., *Anal. Chem.*, 2018, **90** 5481-5488.
12. L. Bonardi, G. Ulrich, R. Ziessel, *Org. Lett.*, 2008, **10** 2183-2186.
13. X. Tang, H. Sun, J. Nie, X.e. Han, Y. Zhao, R. Zhang, et al., *Spectrochim. Acta, Part A.*, 2019, **219** 154-163.
14. Z. Gao, B. Han, K. Chen, J. Sun, X. Hou, *Chem. Commun.*, 2017, **53** 6231-6234.
15. A. Katori, E. Azuma, H. Ishimura, K. Kuramochi, K. Tsubaki, *J. Org. Chem.*, 2015, **80** 4603-4610.
16. L. Wu, K. Burgess, *J. Org. Chem.*, 2008, **73** 8711-8718.
17. W. Ren, H. Xiang, C. Peng, Z. Musha, J. Chen, X. Li, et al., *RSC Advan.*, 2018, **8** 5542-5549.
